# Supplementary material for: Antioxidative Polyketones from the Mangrove-Derived Fungus Ascomycota sp. SK2YWS-L
Source: PubMed Central journal article supplement (PMC5095669; doi:10.1038/srep36609), 2016-11-04
Supplement: srep36609-s1.pdf [file srep36609-s1.pdf]

## Supporting information

### Antioxidative Polyketones from the Mangrove-Derived Fungus *Ascomycota* sp. SK2YWS-L

Chunbin Tan<sup>1†</sup>, Zhaoming Liu<sup>1†</sup>, Senhua Chen<sup>1</sup>, Xishan Huang, Hui Cui<sup>1</sup>, Yuhua Long<sup>1,2,\*</sup>, Yongjun Lu<sup>3,4</sup> and Zhigang She<sup>1,4,\*</sup>

<sup>1</sup>*School of Chemistry and Chemical Engineering, Sun Yat-Sen University, Guangzhou 510275, P. R. China;*

<sup>2</sup>*School of Chemistry and Environment, South China Normal University, 348 West Outer Ring Road, Guangzhou 510006, China;*

<sup>3</sup>*School of Life Sciences and Biomedical Center, Sun Yat-Sen University, Guangzhou 510275, China;*

<sup>4</sup>*South China Sea Bio-Resource Exploitation and Utilization Collaborative Innovation Center, Guangzhou 510006, China.*

\*Corresponding author: Y.L. ([yuhualong68@hotmail.com](mailto:yuhualong68@hotmail.com)) or Z.S. ([cesszhg@mail.sysu.edu.cn](mailto:cesszhg@mail.sysu.edu.cn))

†T.C. and L.Z. contributed equally to this work.

Table of contents:

**Figure S1.** <sup>1</sup>H NMR spectrum of compound **1** in DMSO-*d*<sub>6</sub> (600 MHz).

**Figure S2.** <sup>13</sup>C NMR spectrum of compound **1** in DMSO-*d*<sub>6</sub> (150 MHz).

**Figure S3.** DEPT-90 ° spectrum of compound **1** in DMSO-*d*<sub>6</sub> (150 MHz).  
**Figure S4.** DEPT-135 ° spectrum of compound **1** in DMSO-*d*<sub>6</sub> (150 MHz).  
**Figure S5.** <sup>1</sup>H-<sup>1</sup>H COSY spectrum of compound **1** in DMSO-*d*<sub>6</sub> (600 MHz).  
**Figure S6.** HSQC spectrum of compound **1** in DMSO-*d*<sub>6</sub> (600 MHz).  
**Figure S7.** HMBC spectrum of compound **1** in DMSO-*d*<sub>6</sub> (600 MHz).  
**Figure S8.** <sup>1</sup>H NMR spectrum of compound **2** in DMSO-*d*<sub>6</sub> (600 MHz).  
**Figure S9.** <sup>13</sup>C NMR spectrum of compound **2** in DMSO-*d*<sub>6</sub> (150 MHz).  
**Figure S10.** DEPT-90 ° spectrum of compound **2** in DMSO-*d*<sub>6</sub> (150 MHz).  
**Figure S11.** DEPT-135 ° spectrum of compound **2** in DMSO-*d*<sub>6</sub> (150 MHz).  
**Figure S12.** <sup>1</sup>H-<sup>1</sup>H COSY spectrum of compound **2** in DMSO-*d*<sub>6</sub> (600 MHz).  
**Figure S13.** HSQC spectrum of compound **2** in DMSO-*d*<sub>6</sub> (600 MHz).  
**Figure S14.** HMBC spectrum of compound **2** in DMSO-*d*<sub>6</sub> (600 MHz).  
**Figure S15.** <sup>1</sup>H NMR spectrum of compound **3** in acetone-*d*<sub>6</sub> (600 MHz).  
**Figure S16.** <sup>13</sup>C NMR spectrum of compound **3** in acetone-*d*<sub>6</sub> (150 MHz).  
**Figure S17.** DEPT-90 ° spectrum of compound **3** in acetone-*d*<sub>6</sub> (150 MHz).  
**Figure S18.** DEPT-135 ° spectrum of compound **3** in acetone-*d*<sub>6</sub> (150 MHz).  
**Figure S19.** <sup>1</sup>H-<sup>1</sup>H COSY spectrum of compound **3** in acetone-*d*<sub>6</sub> (600 MHz).  
**Figure S20.** HSQC spectrum of compound **3** in acetone-*d*<sub>6</sub> (600 MHz).  
**Figure S21.** HMBC spectrum of compound **3** in acetone-*d*<sub>6</sub> (600 MHz).  
**Figure S22.** <sup>1</sup>H NMR spectrum of compound **4** in methanol-*d*<sub>4</sub> (500 MHz).  
**Figure S23.** <sup>13</sup>C NMR spectrum of compound **4** in methanol-*d*<sub>4</sub> (125 MHz).  
**Figure S24.** DEPT-90 ° spectrum of compound **4** in methanol-*d*<sub>4</sub> (125 MHz).  
**Figure S25.** DEPT-135 ° spectrum of compound **4** in methanol-*d*<sub>4</sub> (125 MHz).  
**Figure S26.** <sup>1</sup>H-<sup>1</sup>H COSY spectrum of compound **4** in methanol-*d*<sub>4</sub> (500 MHz).  
**Figure S27.** HSQC spectrum of compound **4** in methanol-*d*<sub>4</sub> (500 MHz).  
**Figure S28.** HMBC spectrum of compound **4** in methanol-*d*<sub>4</sub> (500 MHz).

- Figure S29.**  $^1\text{H}$  NMR spectrum of compound **5** in methanol- $d_4$  (500 MHz).
- Figure S30.**  $^{13}\text{C}$  NMR spectrum of compound **5** in methanol- $d_4$  (125 MHz).
- Figure S31.** DEPT-90  $^\circ$  spectrum of compound **5** in methanol- $d_4$  (125 MHz).
- Figure S32.** DEPT-135  $^\circ$  spectrum of compound **5** in methanol- $d_4$  (125 MHz).
- Figure S33.**  $^1\text{H}$ - $^1\text{H}$  COSY spectrum of compound **5** in methanol- $d_4$  (500 MHz).
- Figure S34.** HSQC spectrum of compound **5** in methanol- $d_4$  (500 MHz).
- Figure S35.** HMBC spectrum of compound **5** in methanol- $d_4$  (500 MHz).
- Figure S36.** HRESIMS spectrum of compound **1**.
- Figure S37.** HRESIMS spectrum of compound **2**.
- Figure S38.** HRESIMS spectrum of compound **3**.
- Figure S39.** HRESIMS spectrum of compound **4**.
- Figure S40.** HREI-MS spectrum of compound **5**.

**Figure S1.**  $^1\text{H}$  NMR spectrum of compound **1** in  $\text{DMSO-}d_6$  (600 MHz).

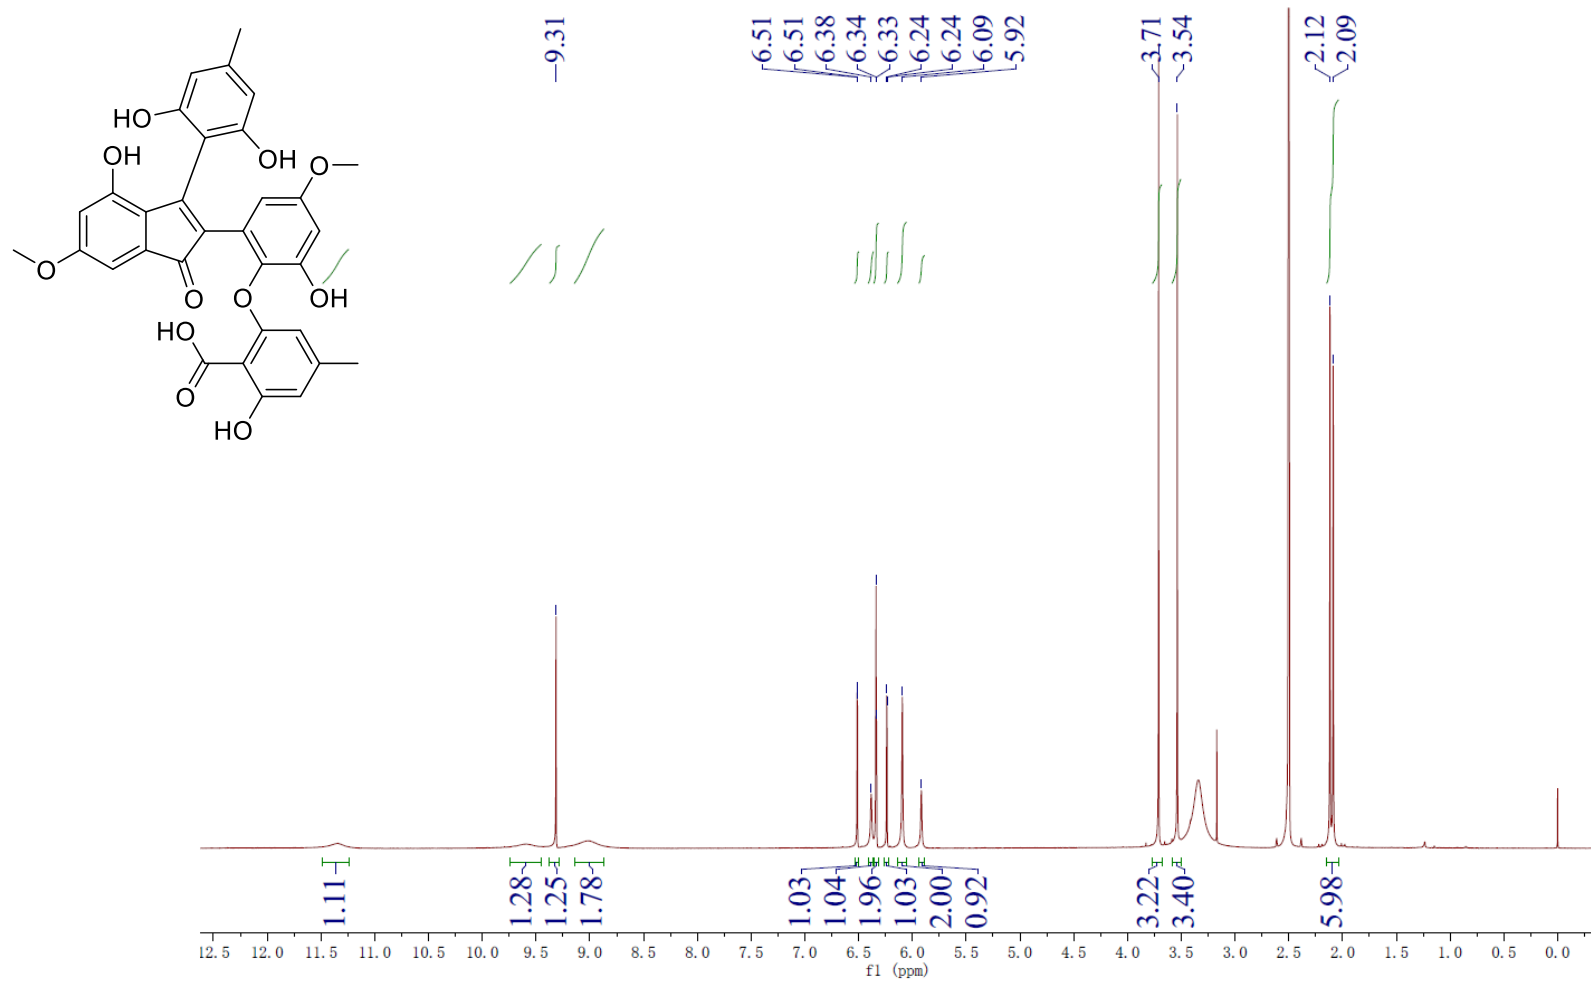

**Figure S2.**  $^{13}\text{C}$  NMR spectrum of compound **1** in  $\text{DMSO-}d_6$  (150 MHz).

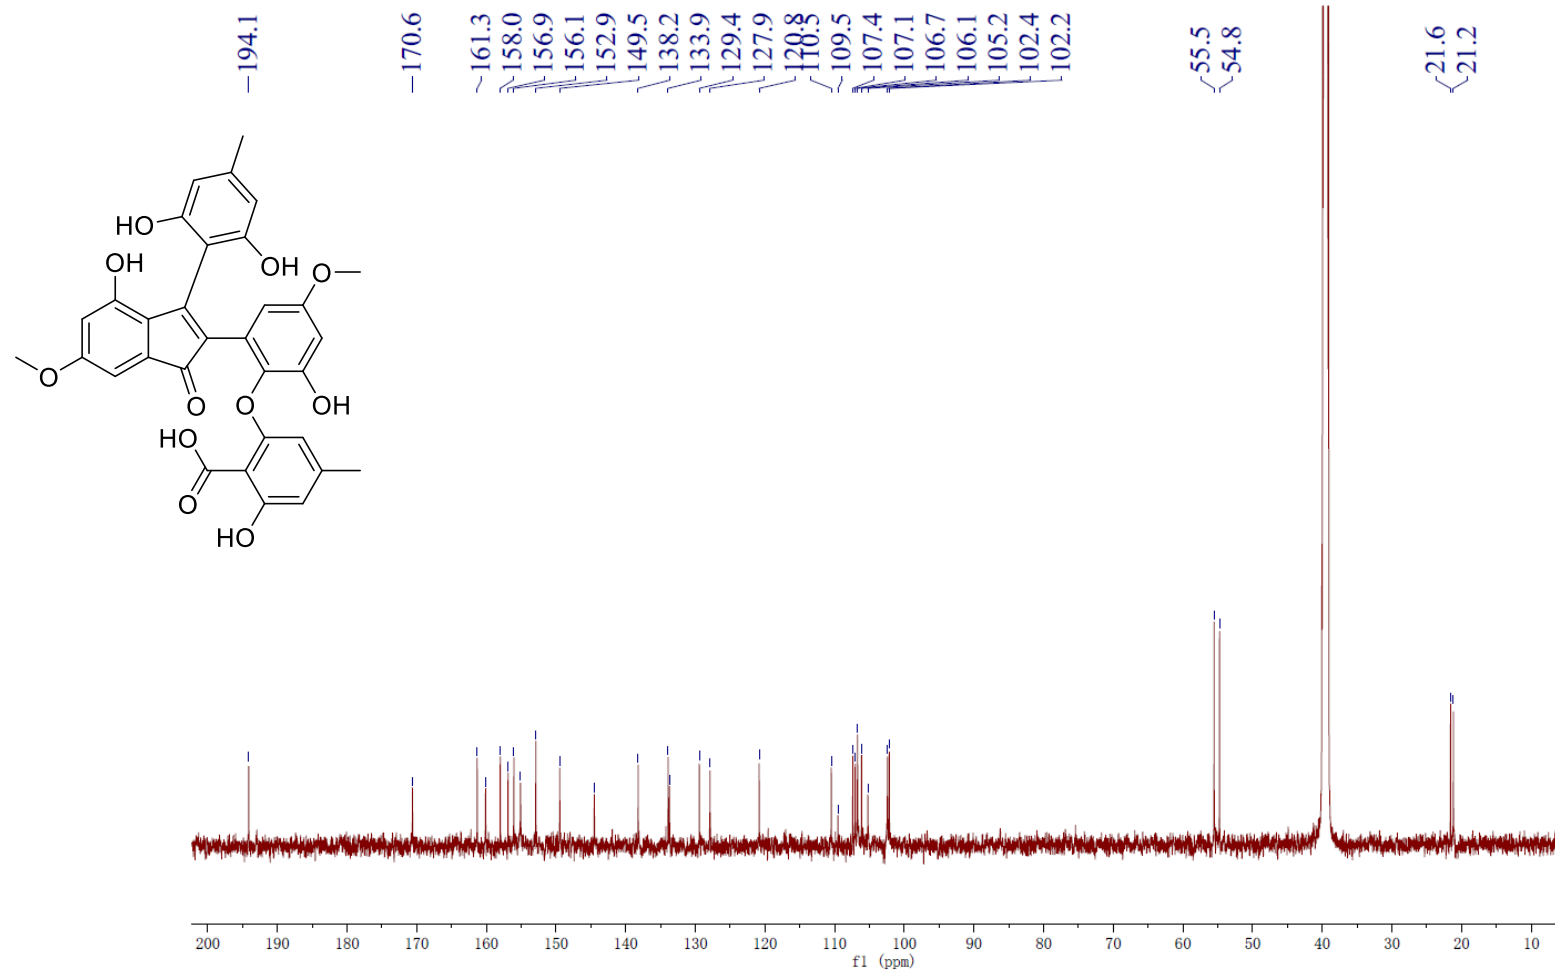

**Figure S3.** DEPT-90 ° spectrum of compound **1** in DMSO-*d*<sub>6</sub> (150 MHz).

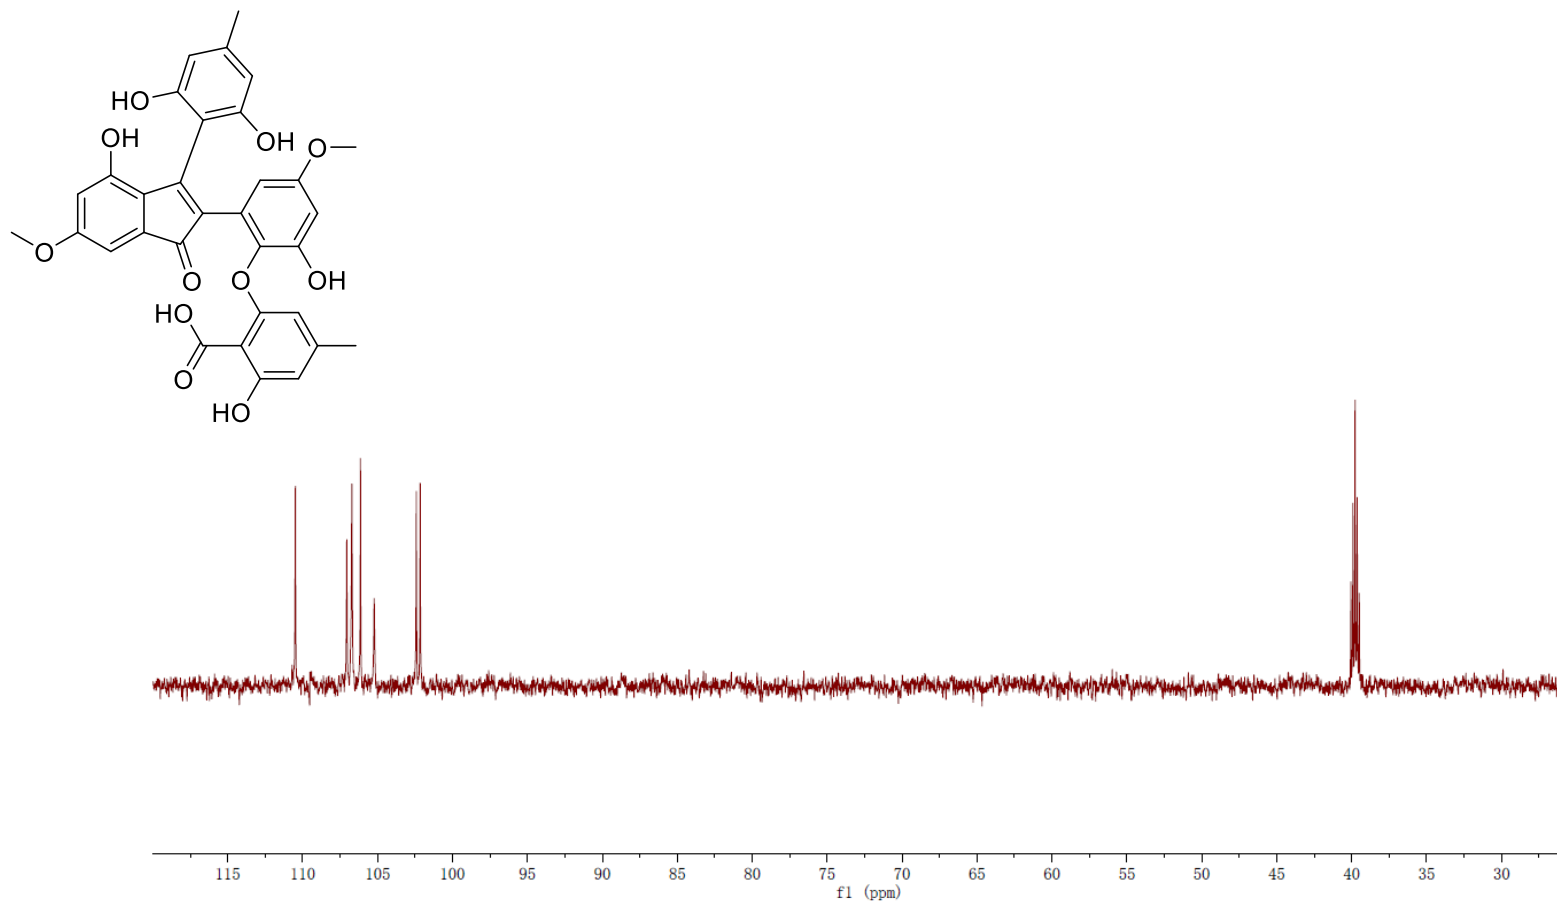

**Figure S4.** DEPT-135 ° spectrum of compound **1** in DMSO-*d*<sub>6</sub> (150 MHz).

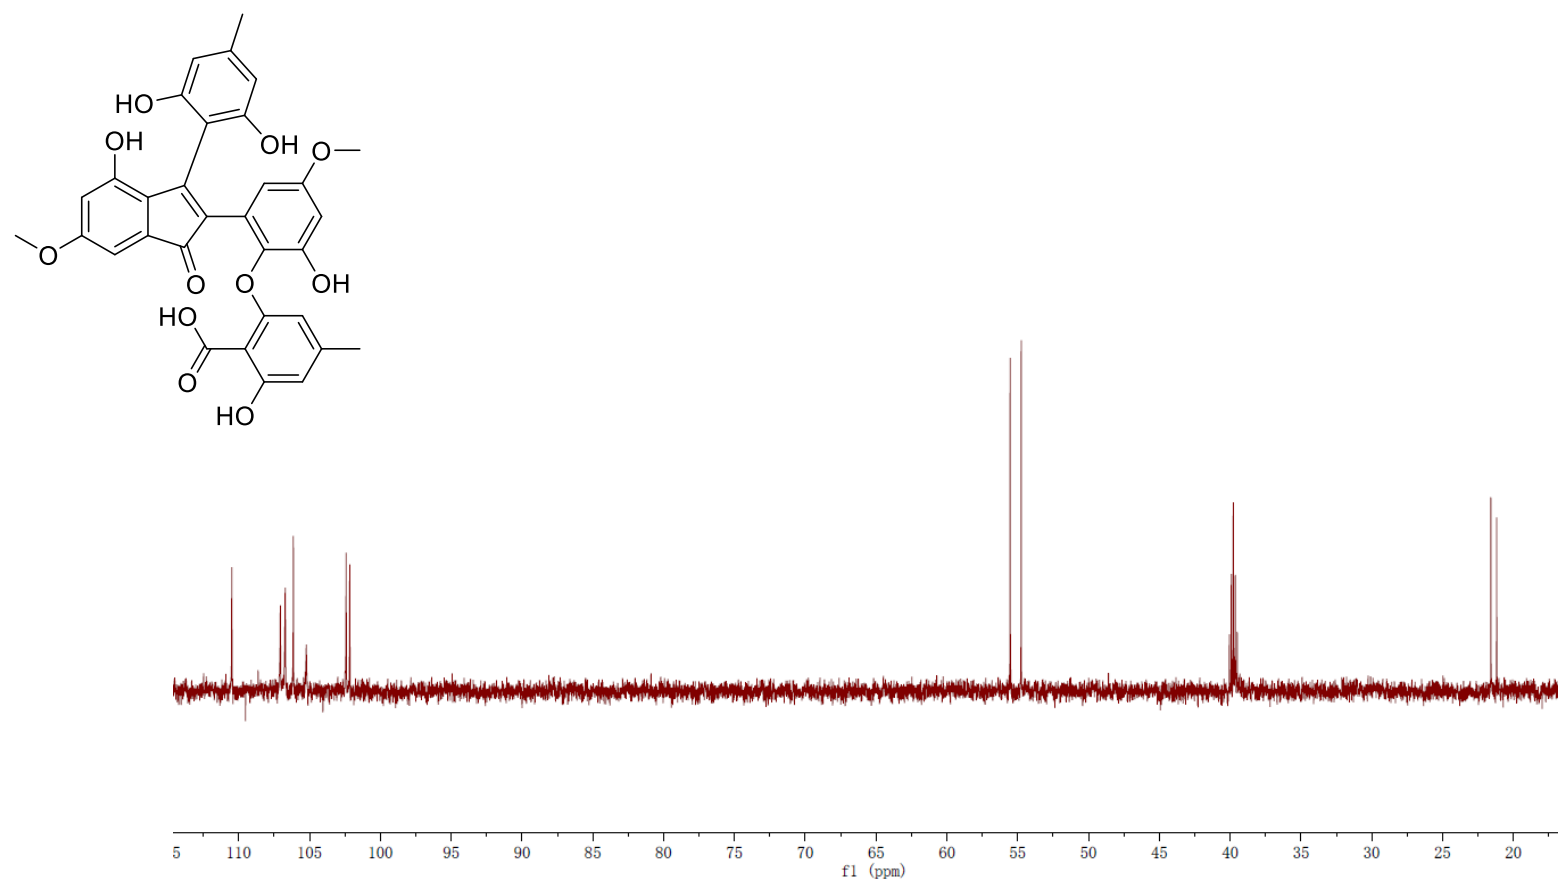

**Figure S5.**  $^1\text{H}$ - $^1\text{H}$  COSY spectrum of compound **1** in  $\text{DMSO-}d_6$  (600 MHz).

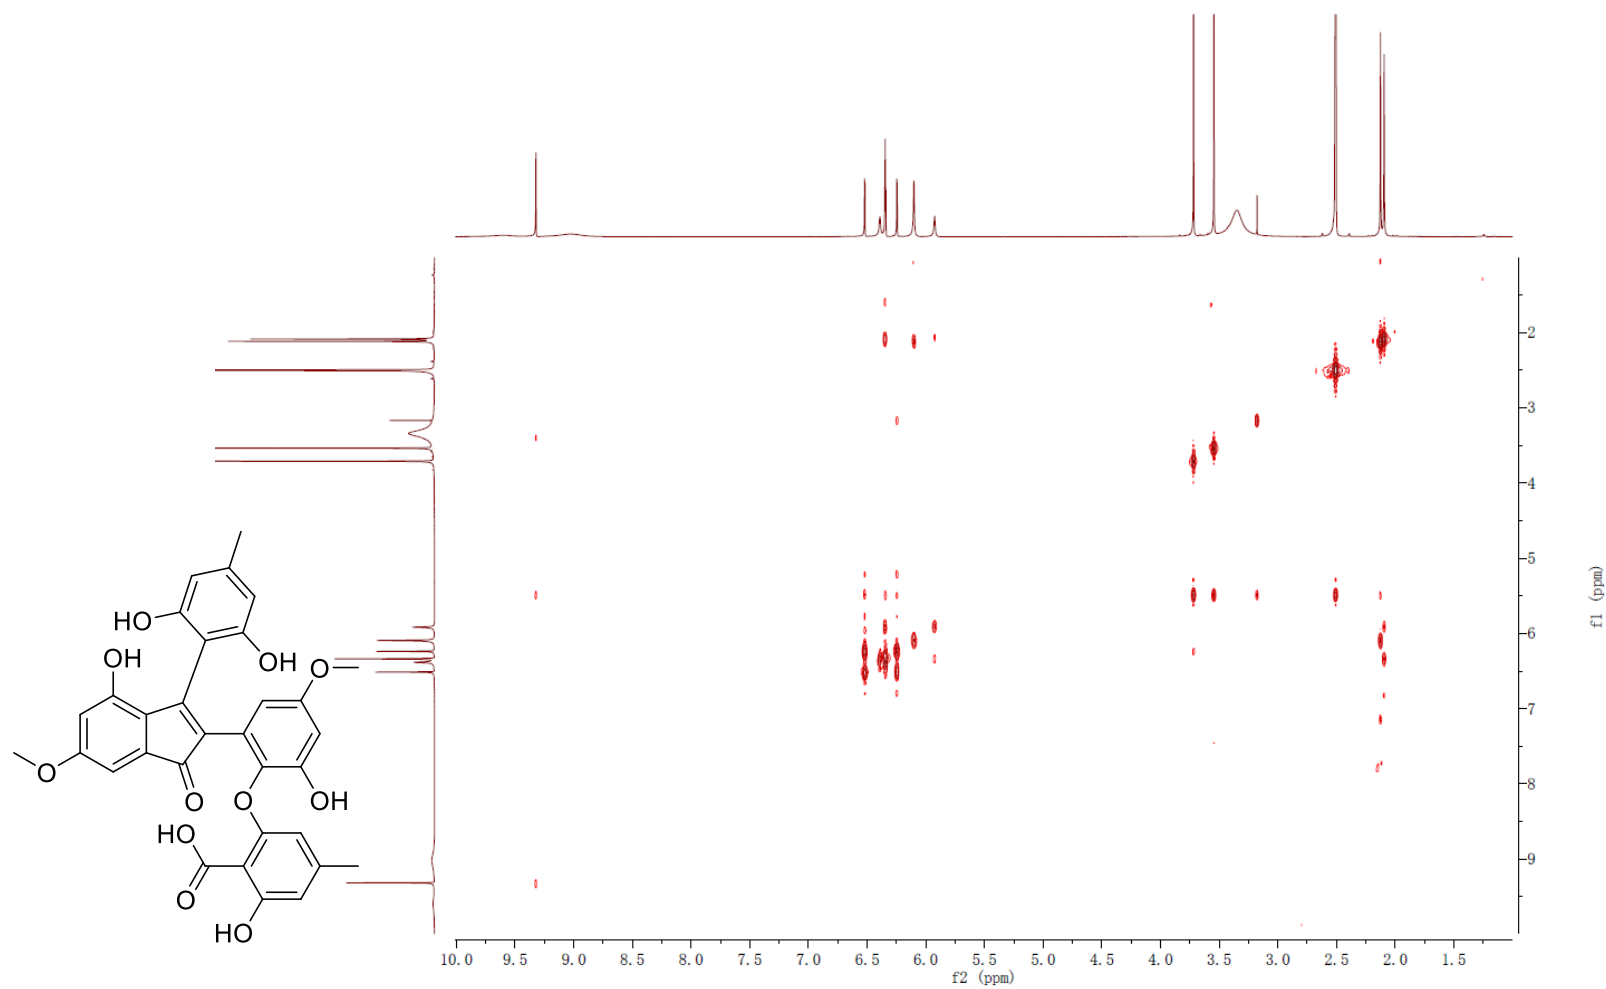



**Figure S6.** HSQC spectrum of compound **1** in DMSO-*d*<sub>6</sub> (600 MHz).

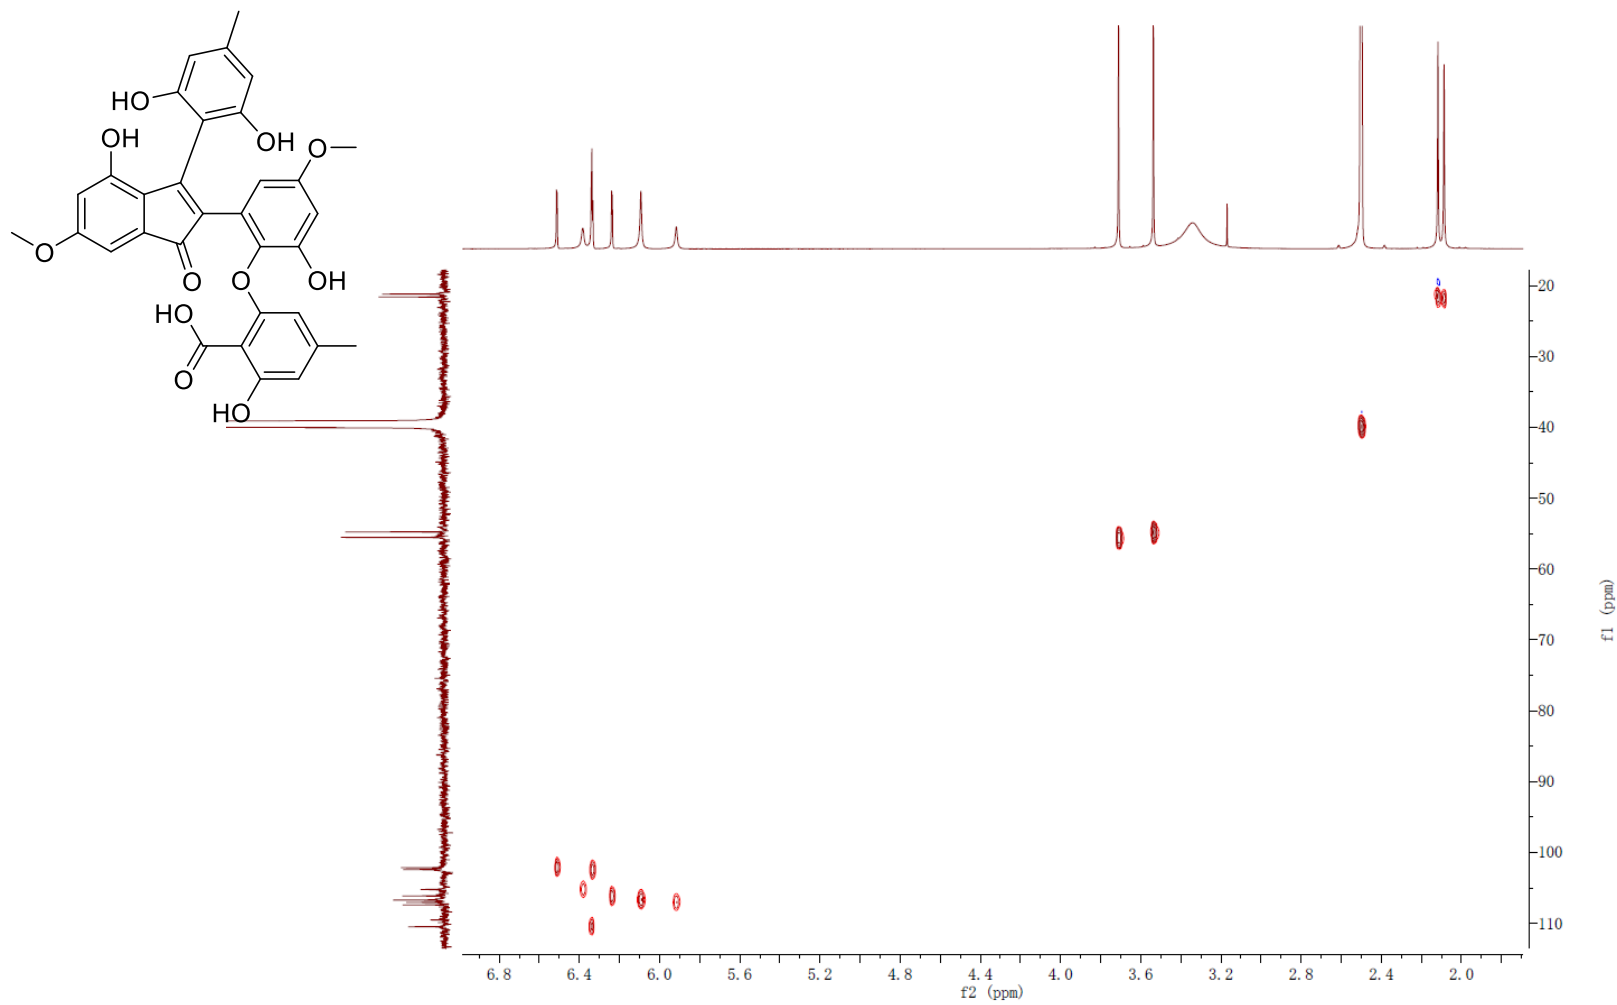

**Figure S7.** HMBC spectrum of compound **1** in DMSO-*d*<sub>6</sub> (600 MHz).

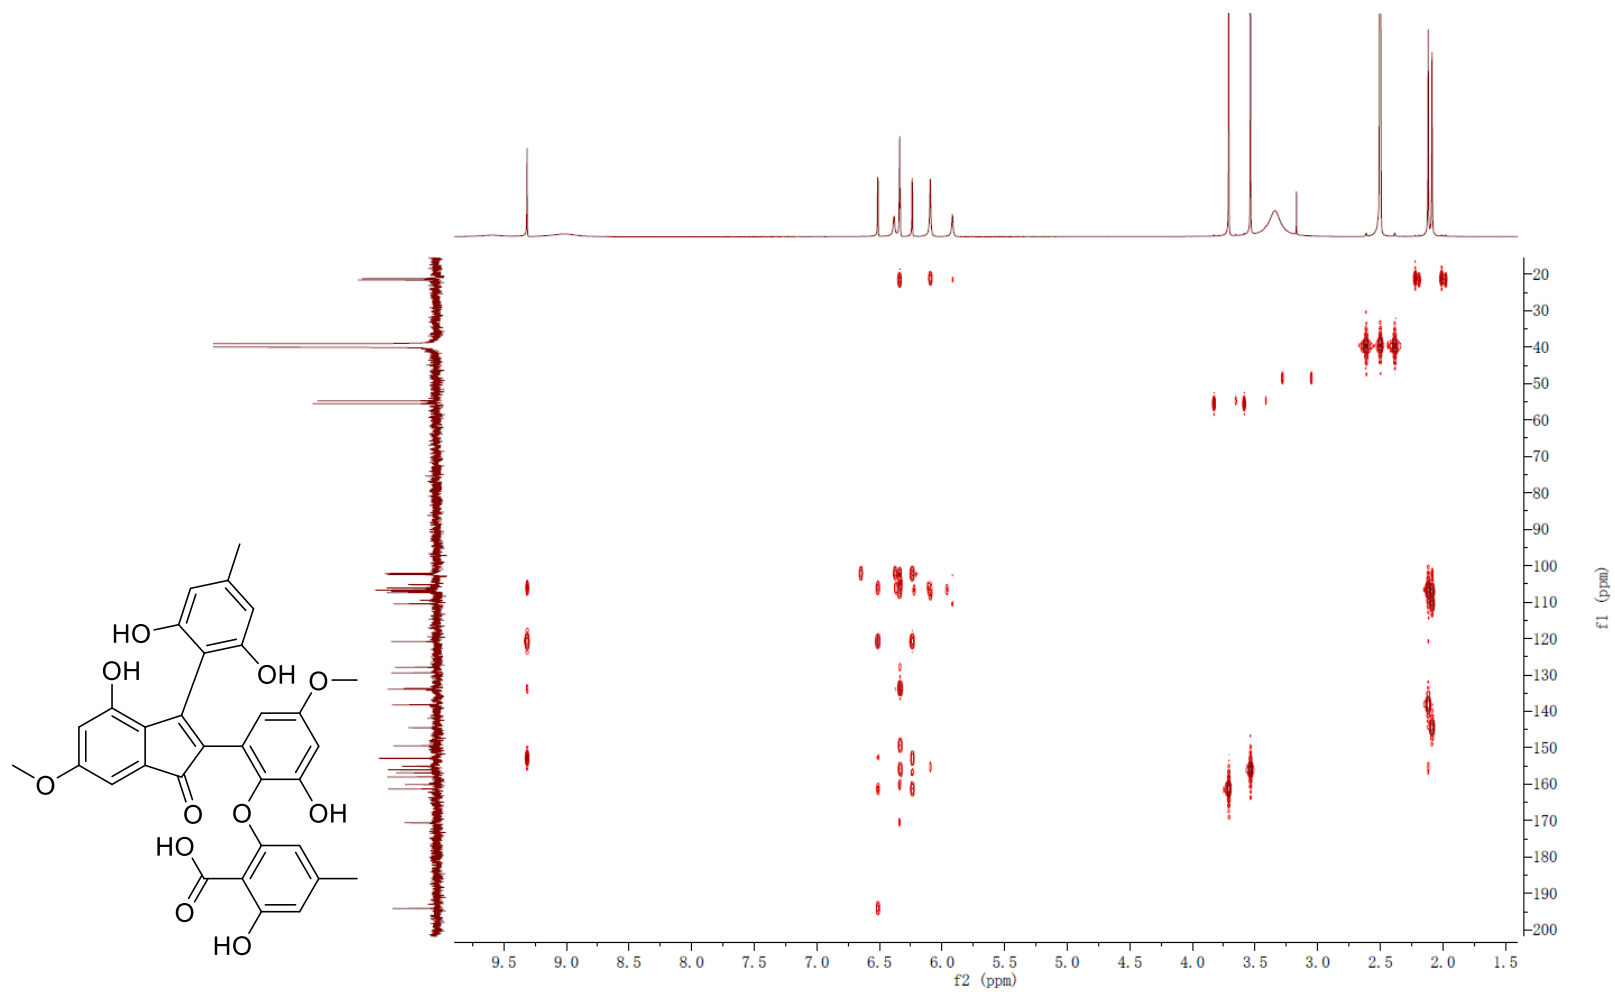

**Figure S8.**  $^1\text{H}$  NMR spectrum of compound **2** in  $\text{DMSO-}d_6$  (600 MHz).

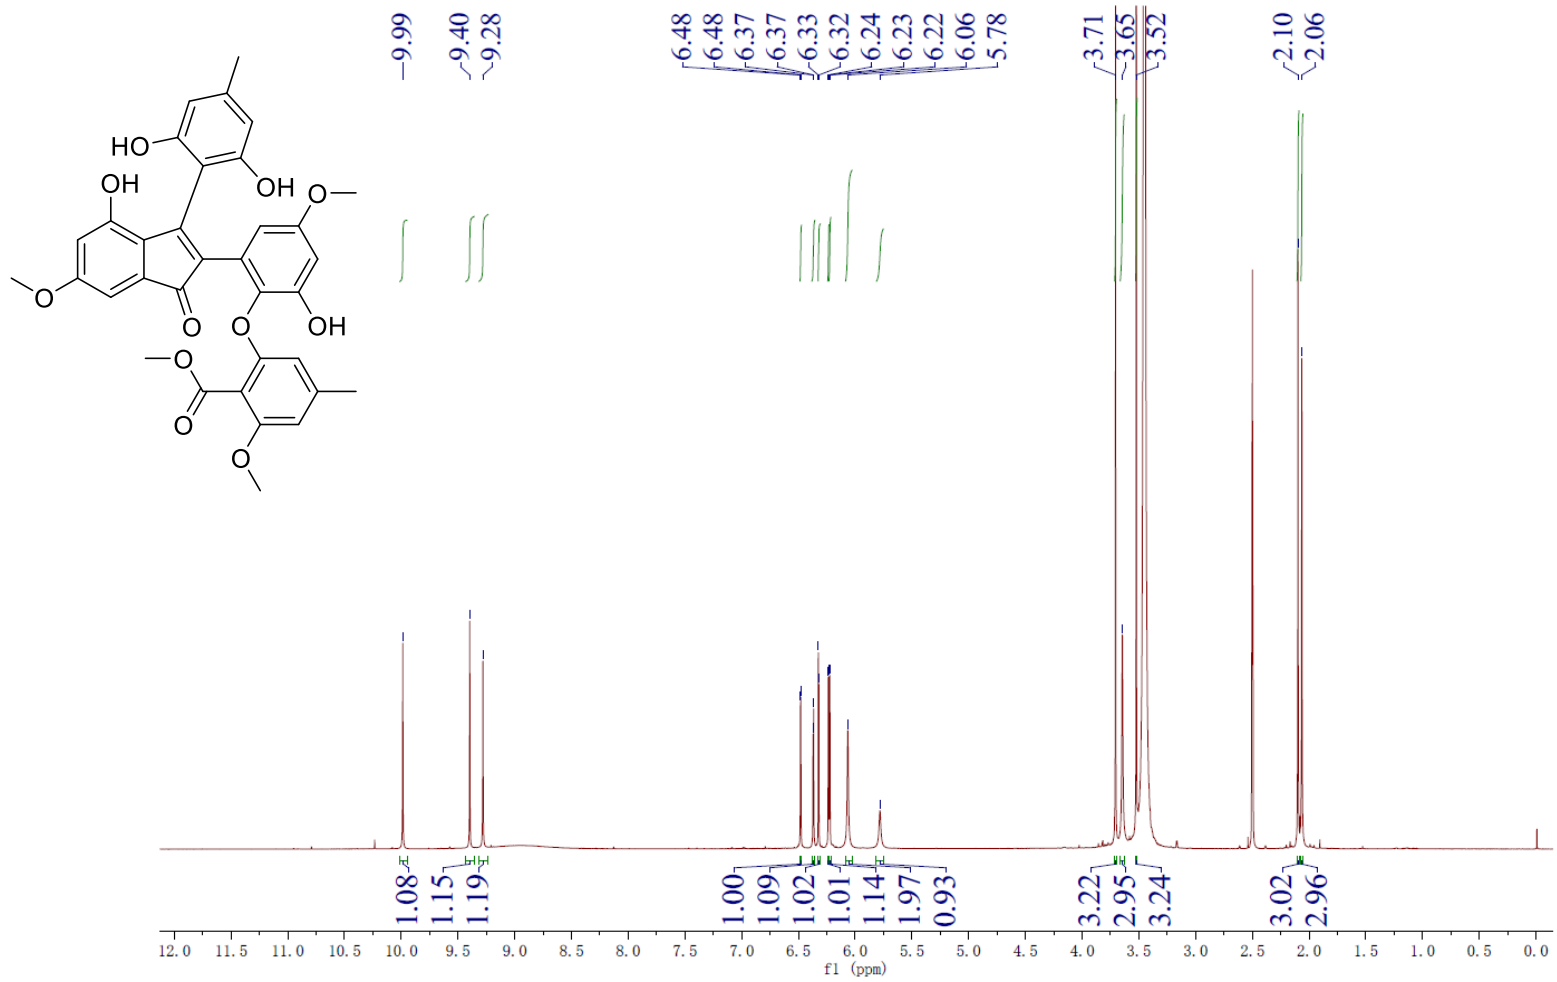

**Figure S9.**  $^{13}\text{C}$  NMR spectrum of compound **2** in  $\text{DMSO-}d_6$  (150 MHz).

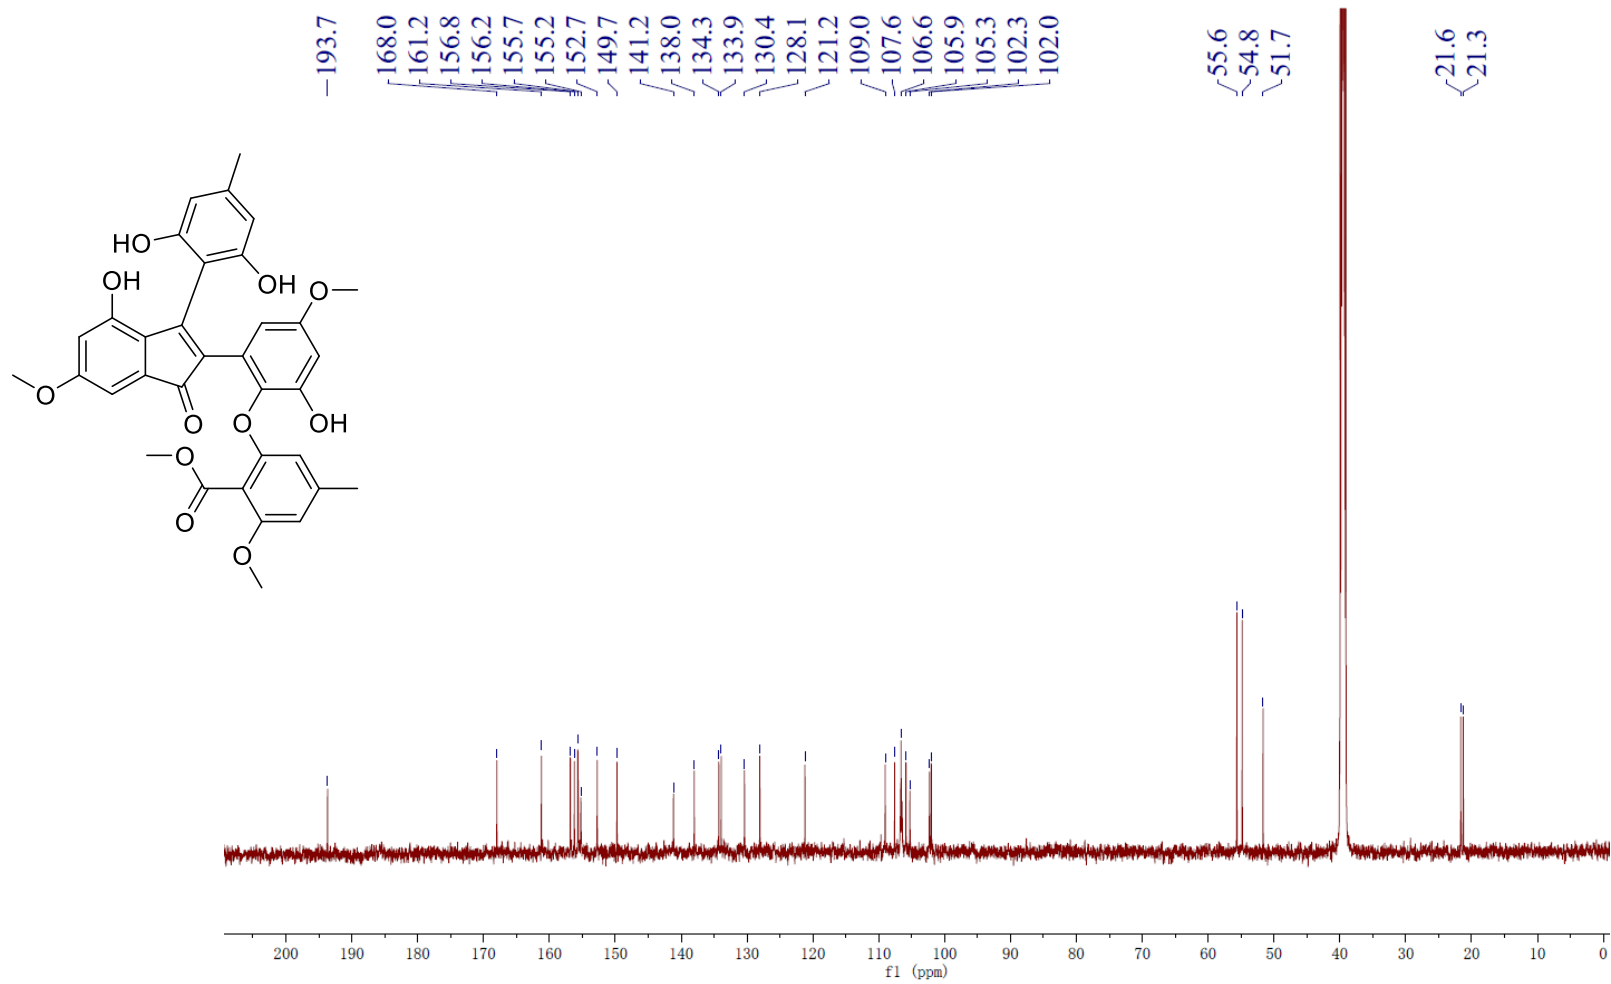

**Figure S10.** DEPT-90 ° spectrum of compound **2** in DMSO-*d*<sub>6</sub> (150 MHz).

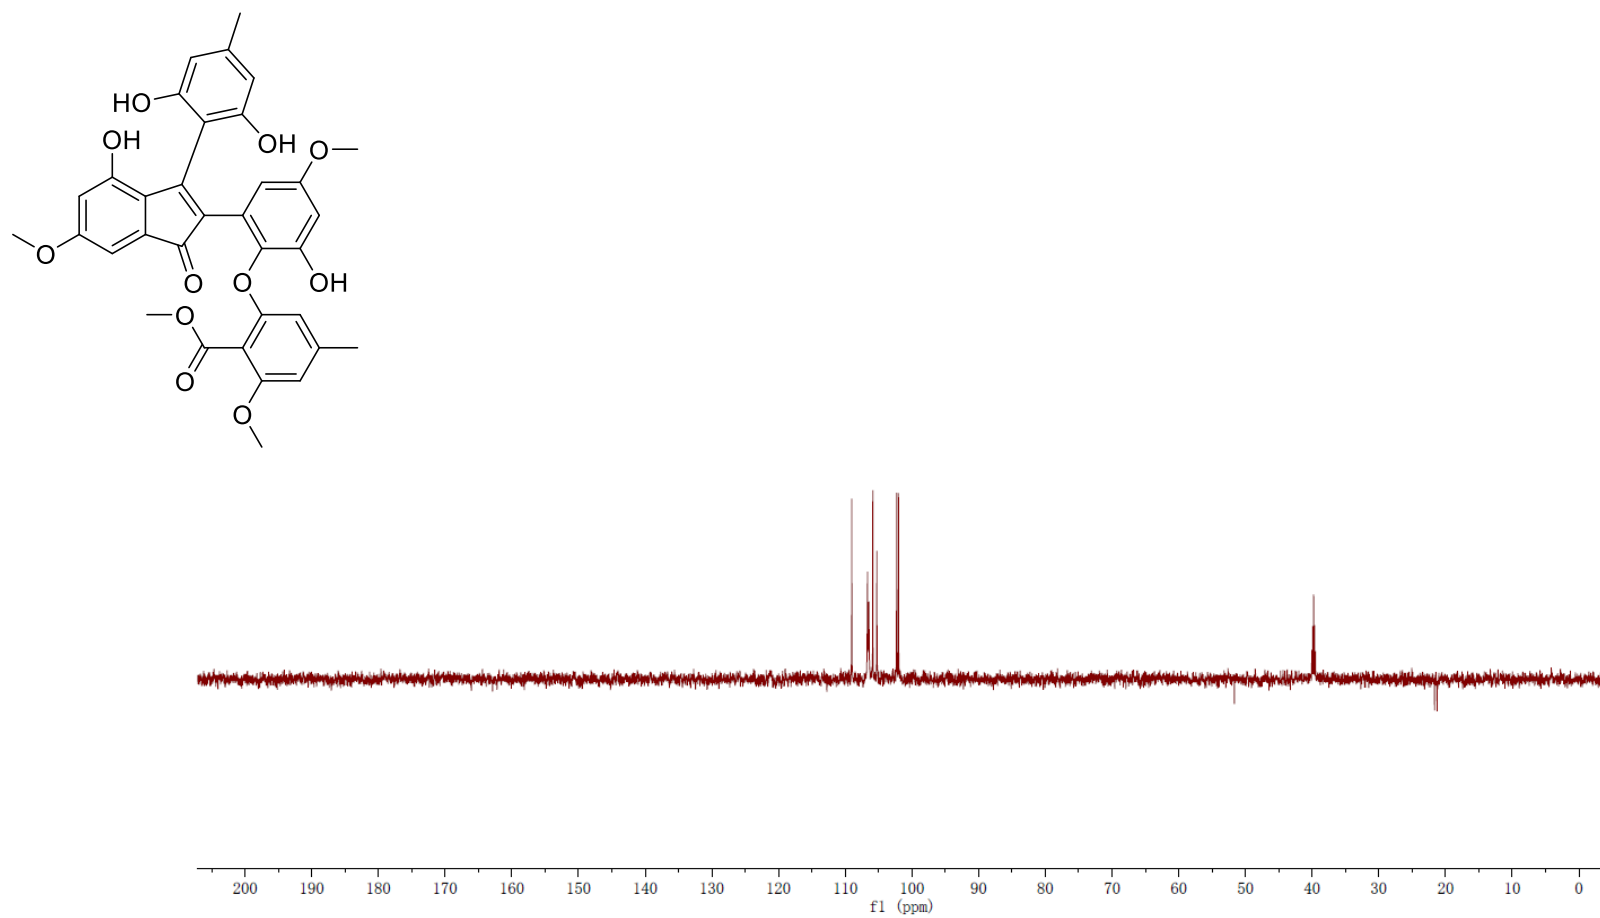

**Figure S11.** DEPT-135 ° spectrum of compound **2** in DMSO-*d*<sub>6</sub> (150 MHz).

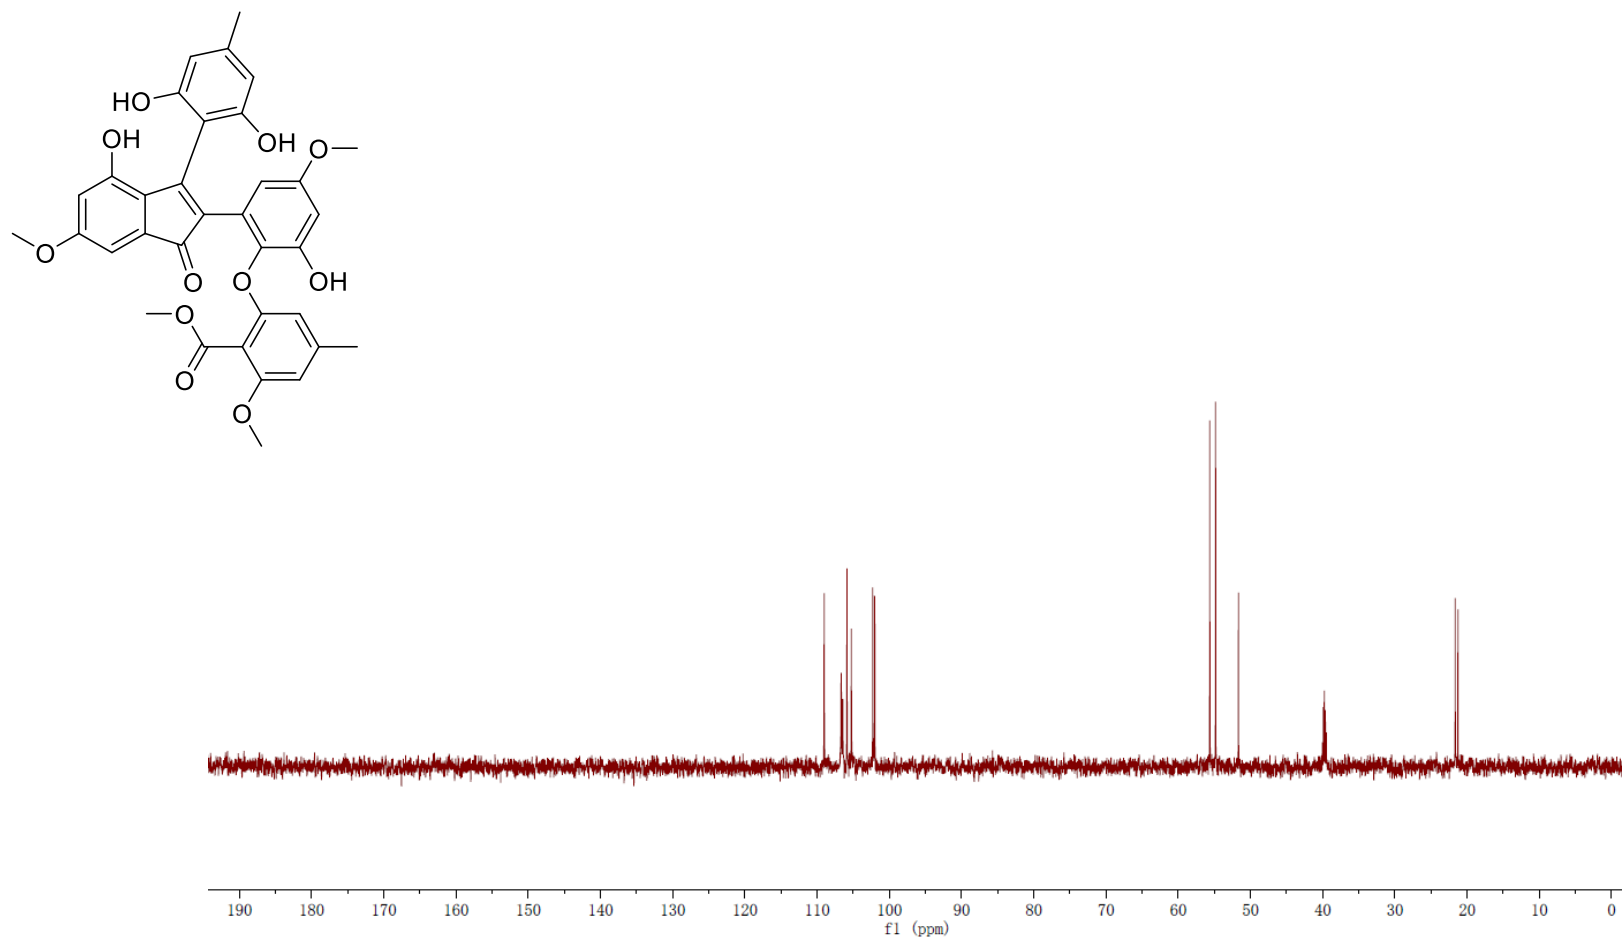

**Figure S12.**  $^1\text{H}$ - $^1\text{H}$  COSY spectrum of compound **2** in  $\text{DMSO-}d_6$  (600 MHz).

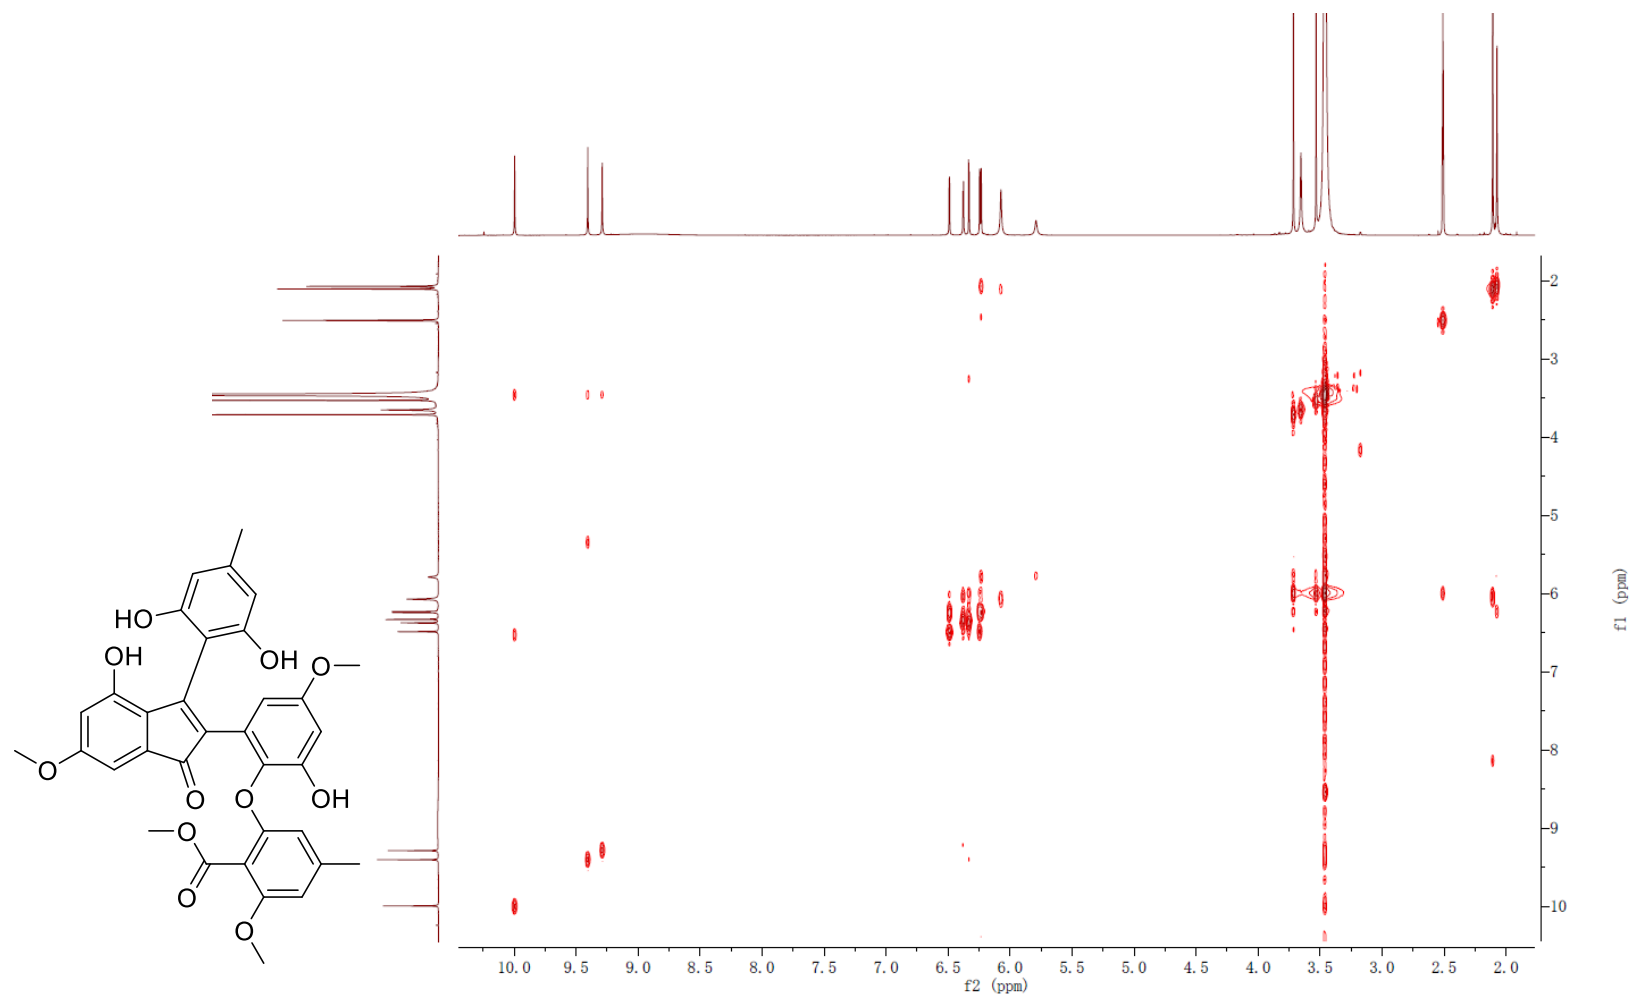

**Figure S13.** HSQC spectrum of compound **2** in DMSO- $d_6$  (600 MHz).

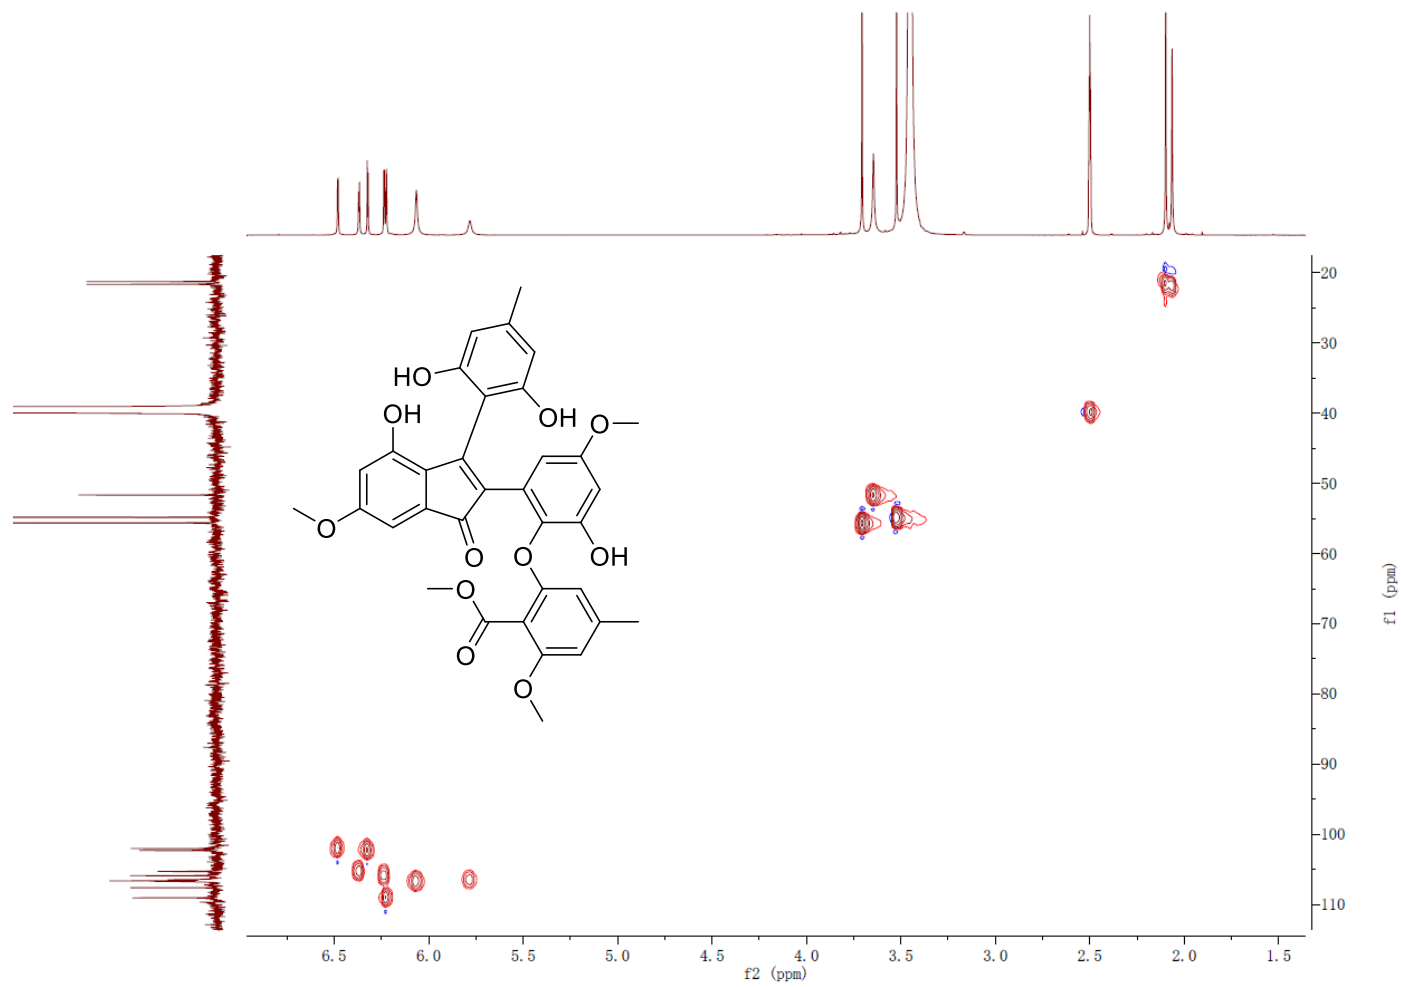



**Figure S14.** HMBC spectrum of compound **2** in DMSO-*d*<sub>6</sub> (600 MHz).

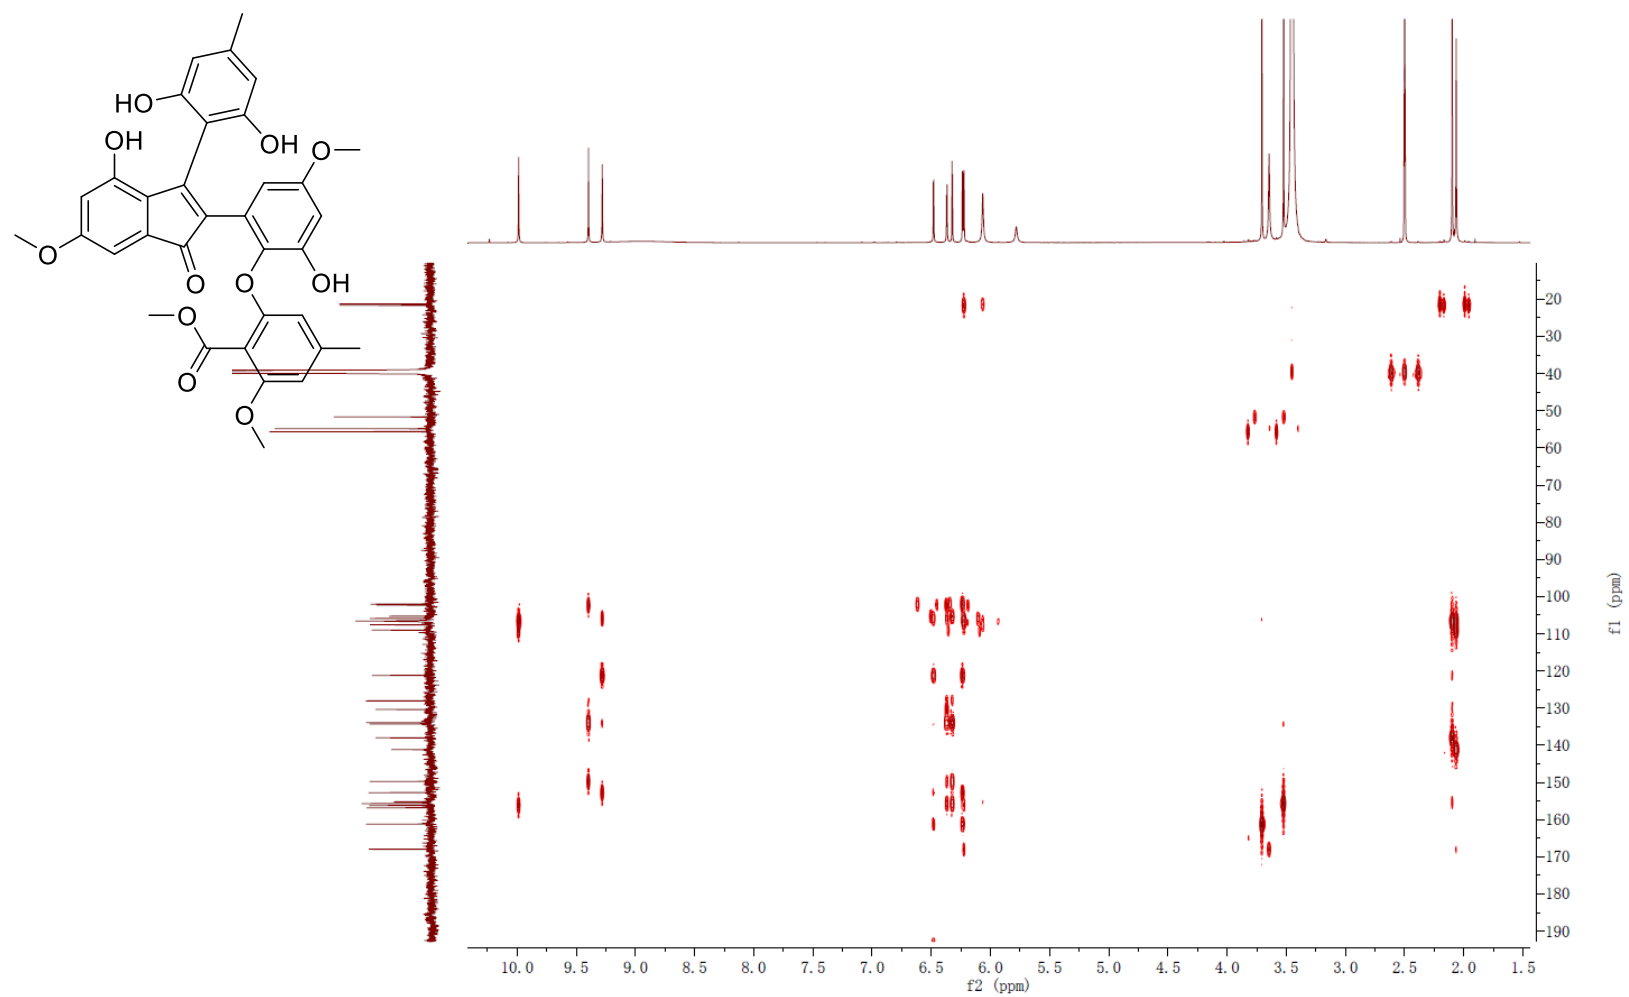

**Figure S15.**  $^1\text{H}$  NMR spectrum of compound **3** in acetone- $d_6$  (600 MHz).

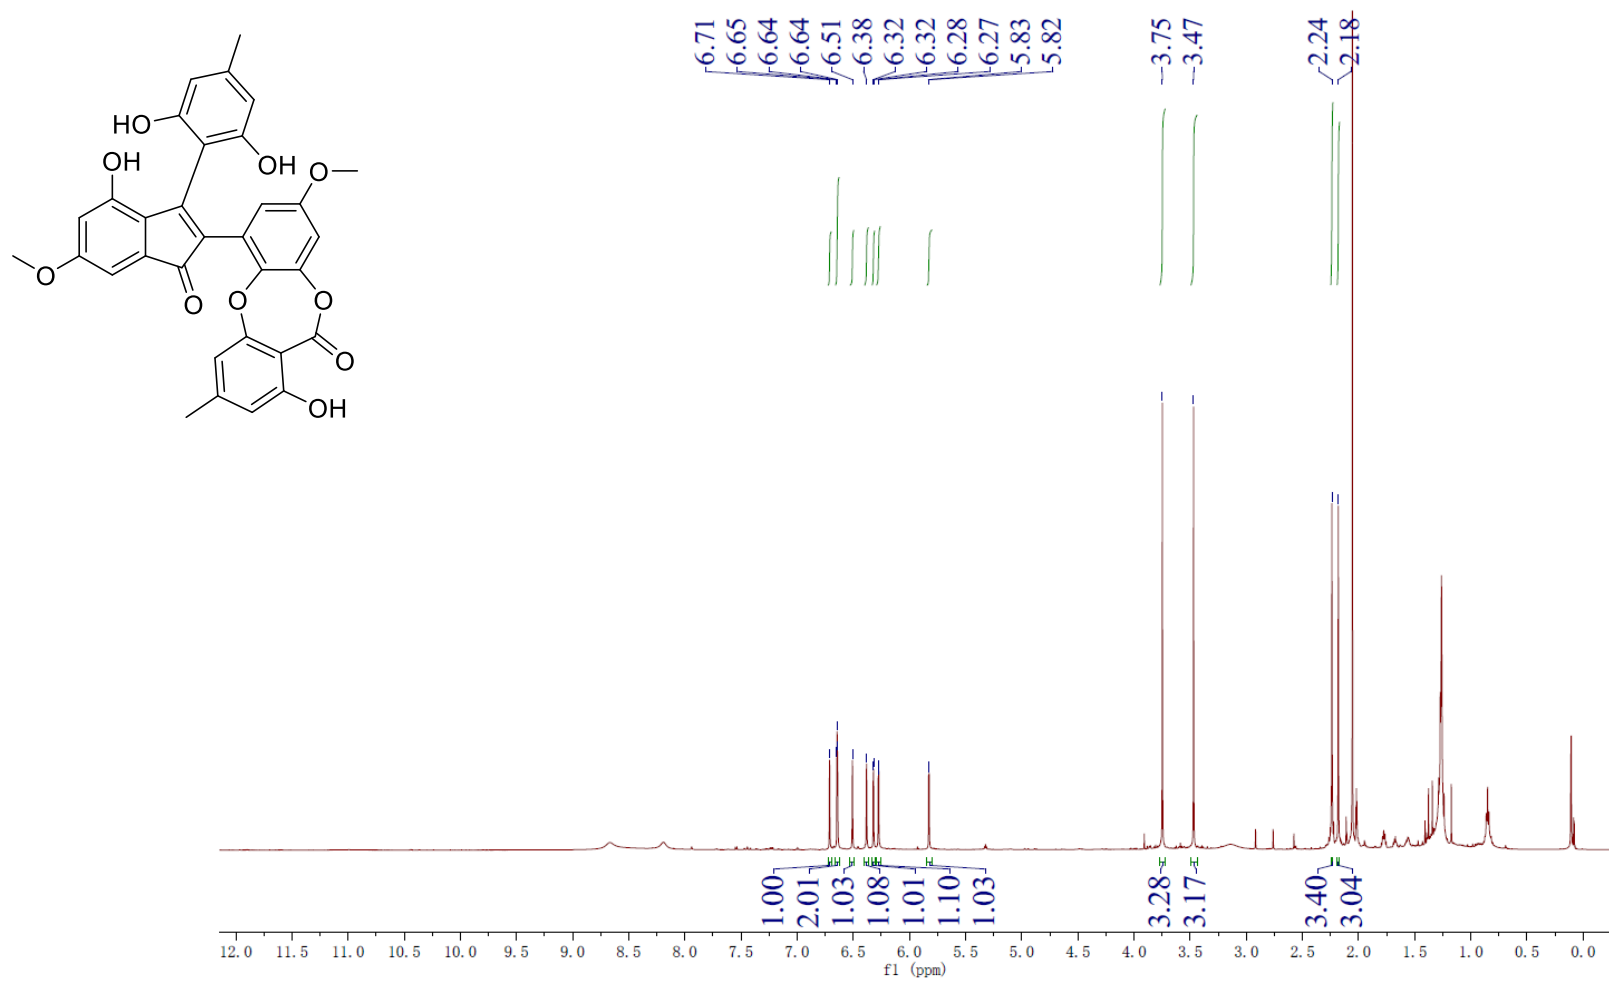

**Figure S16.**  $^{13}\text{C}$  NMR spectrum of compound **3** in acetone- $d_6$  (150 MHz).

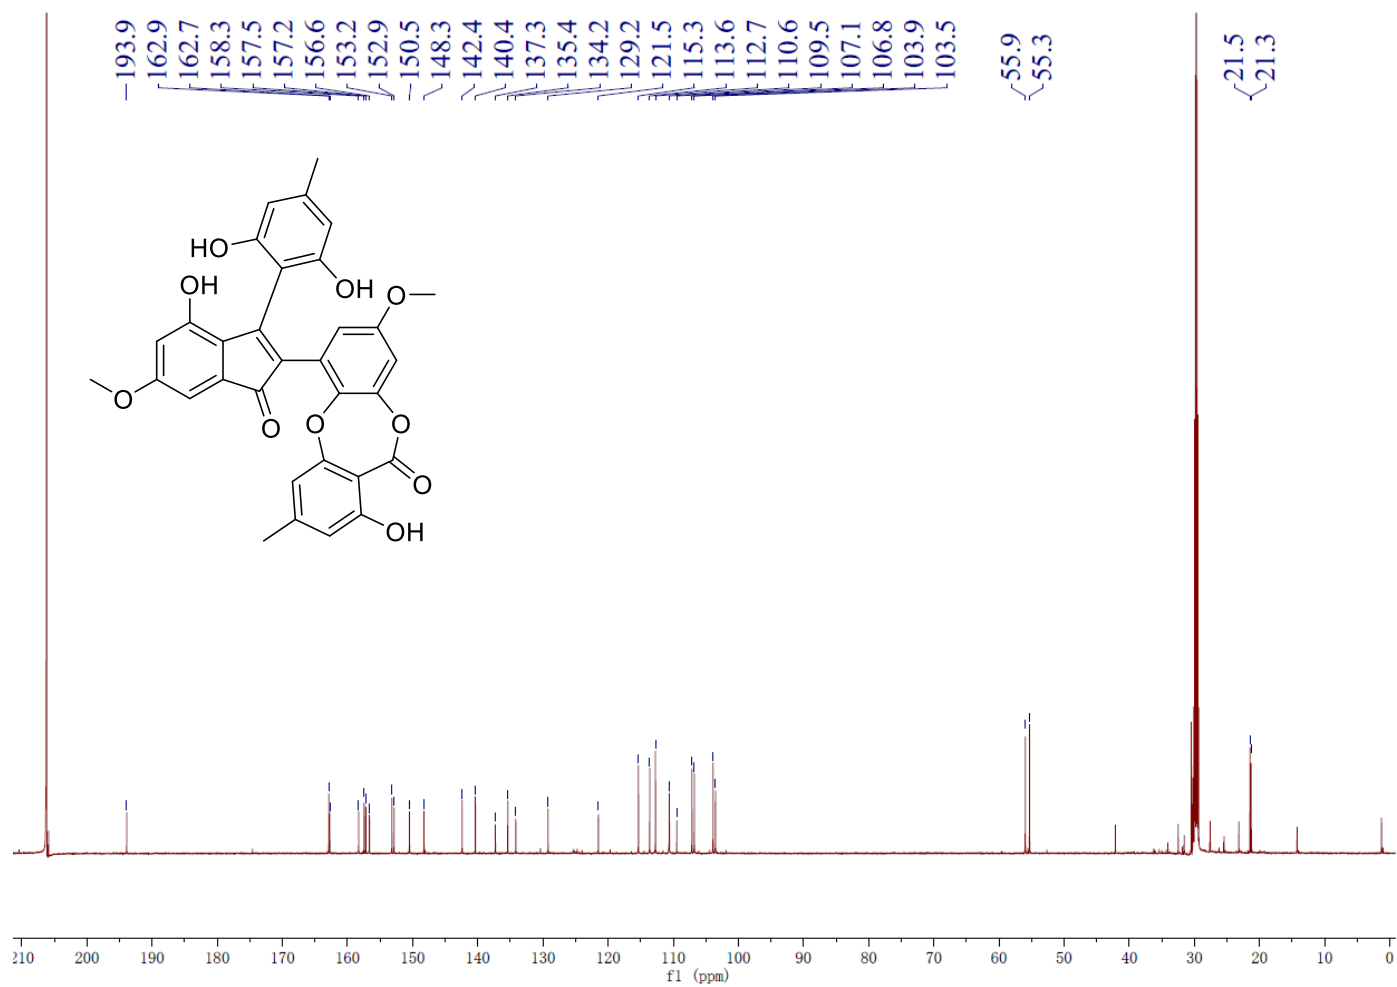

**Figure S17.** DEPT-90 ° spectrum of compound **3** in acetone-*d*<sub>6</sub> (150 MHz).

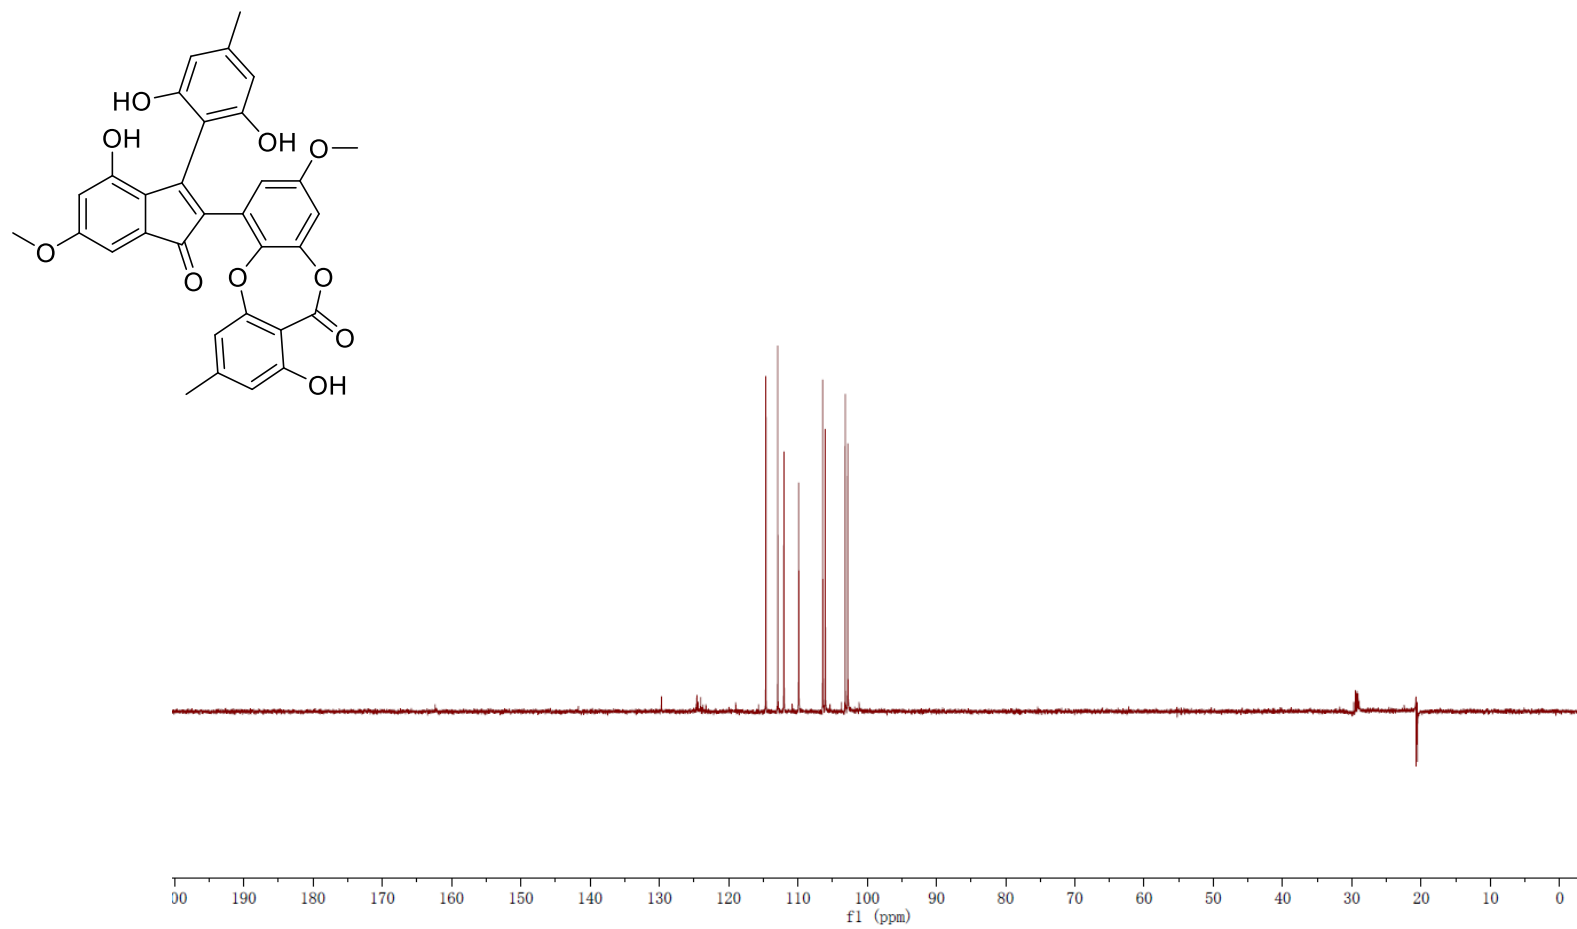

**Figure S18.** DEPT-135 ° spectrum of compound **3** in acetone-*d*<sub>6</sub> (150 MHz).

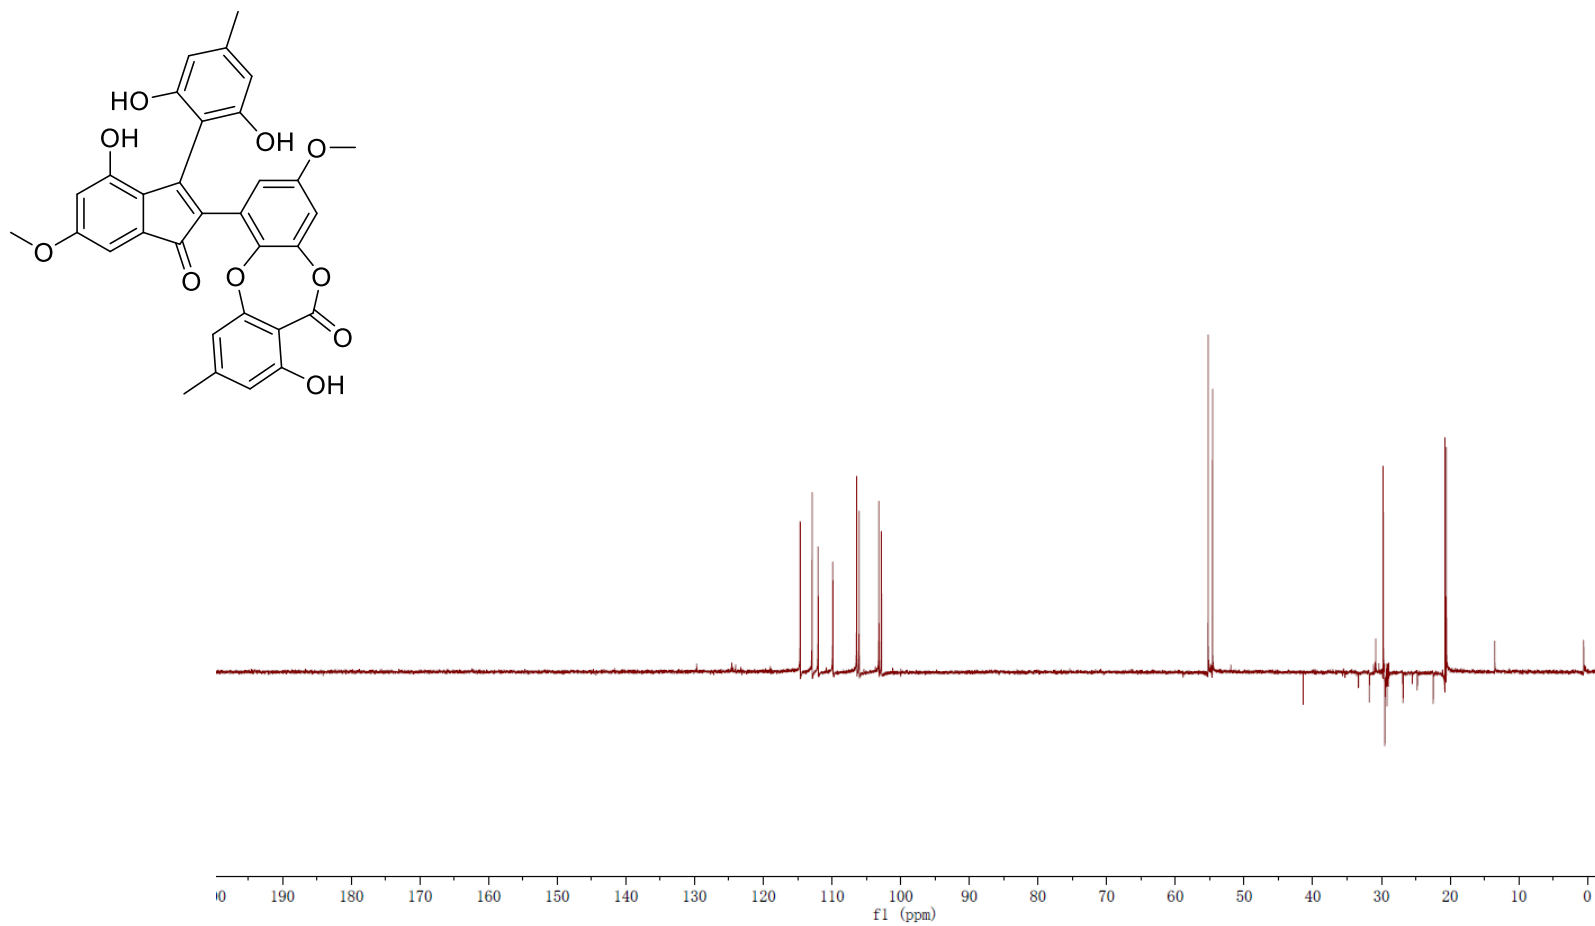

**Figure S19.**  $^1\text{H}$ - $^1\text{H}$  COSY spectrum of compound **3** in acetone- $d_6$  (600 MHz).

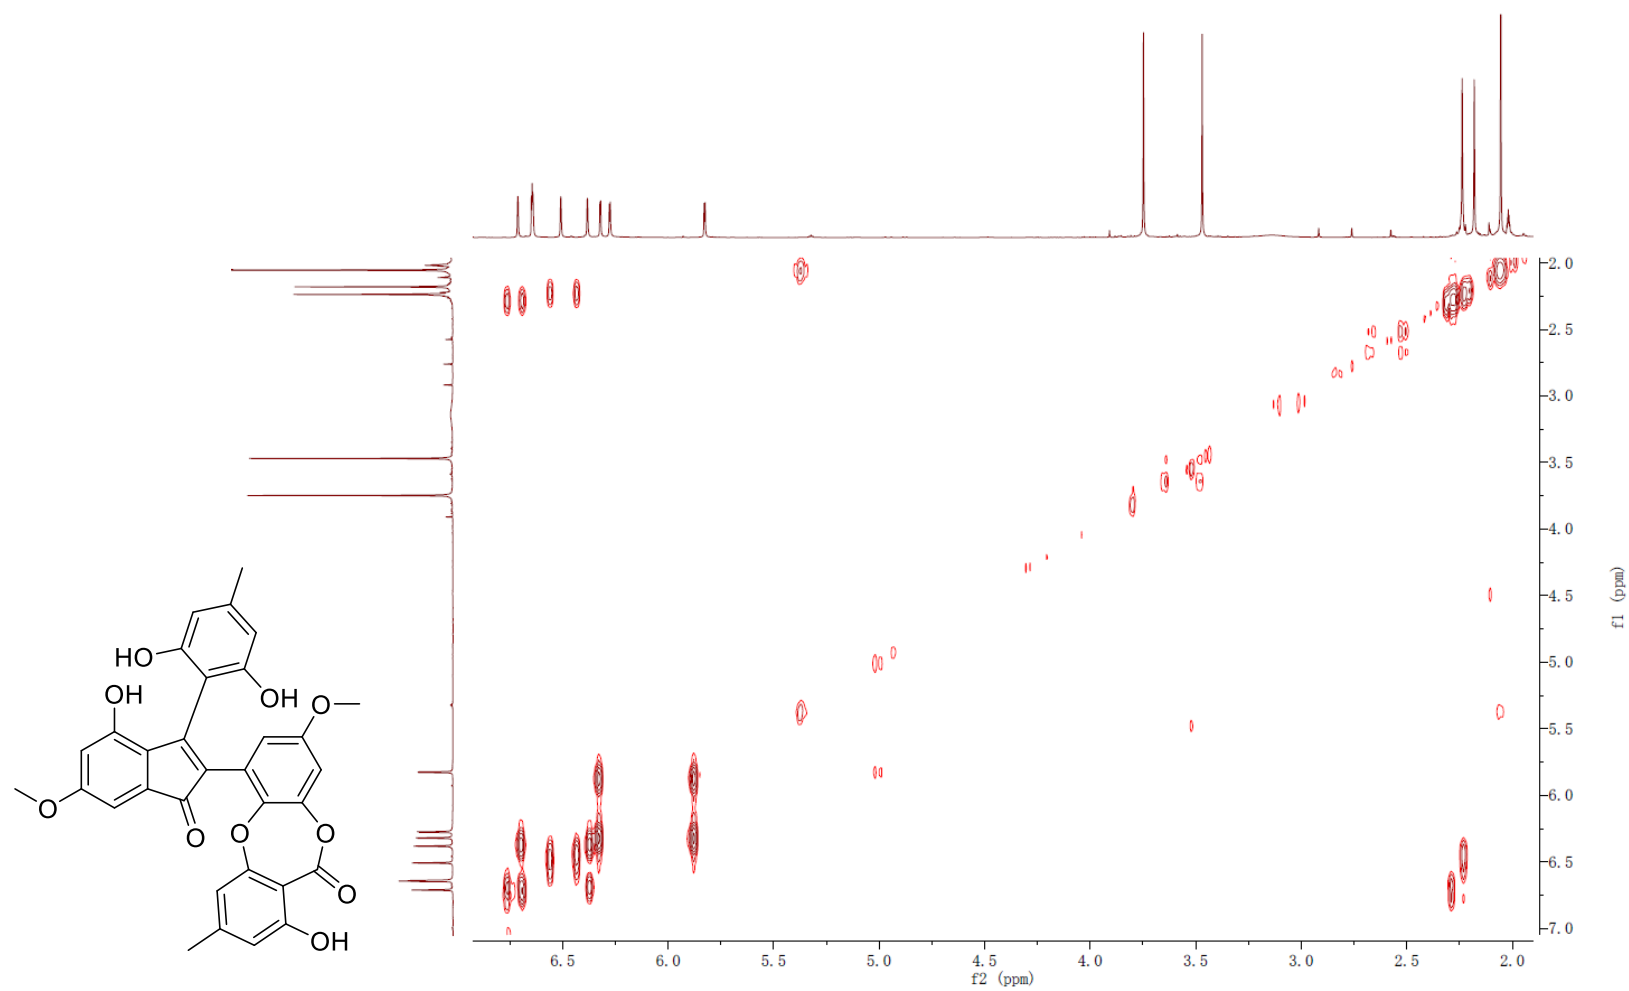

**Figure S20.** HSQC spectrum of compound **3** in acetone- $d_6$  (600 MHz).

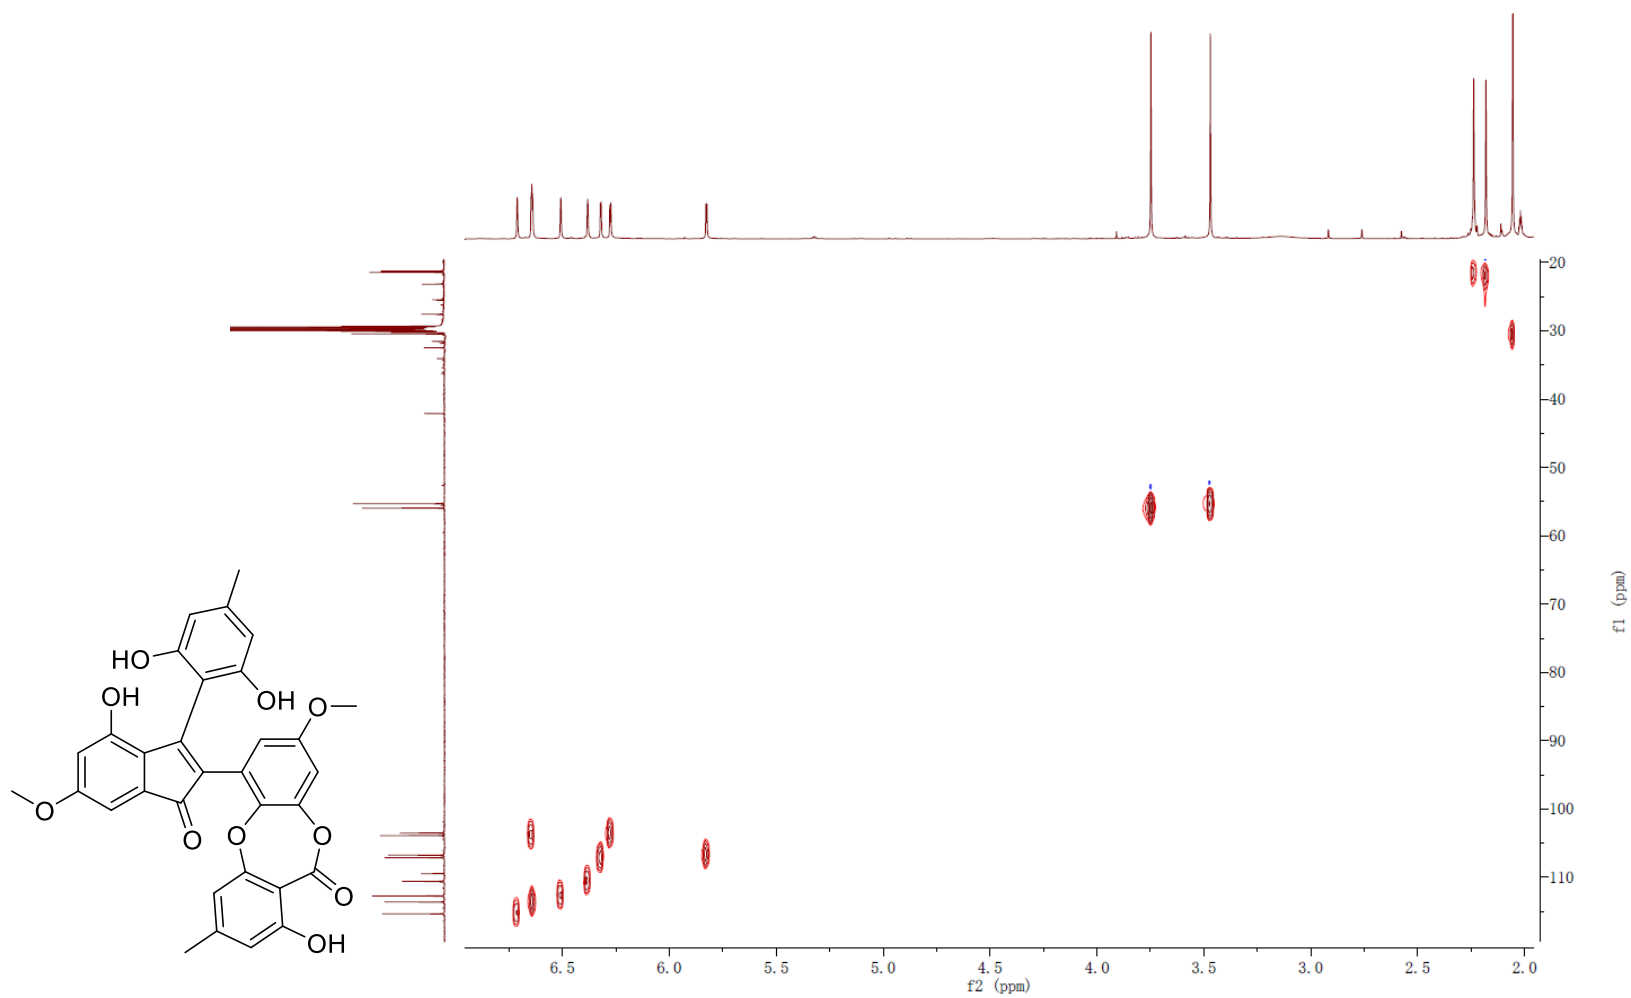

**Figure S21.** HSQC spectrum of compound **3** in acetone-*d*<sub>6</sub> (600 MHz).

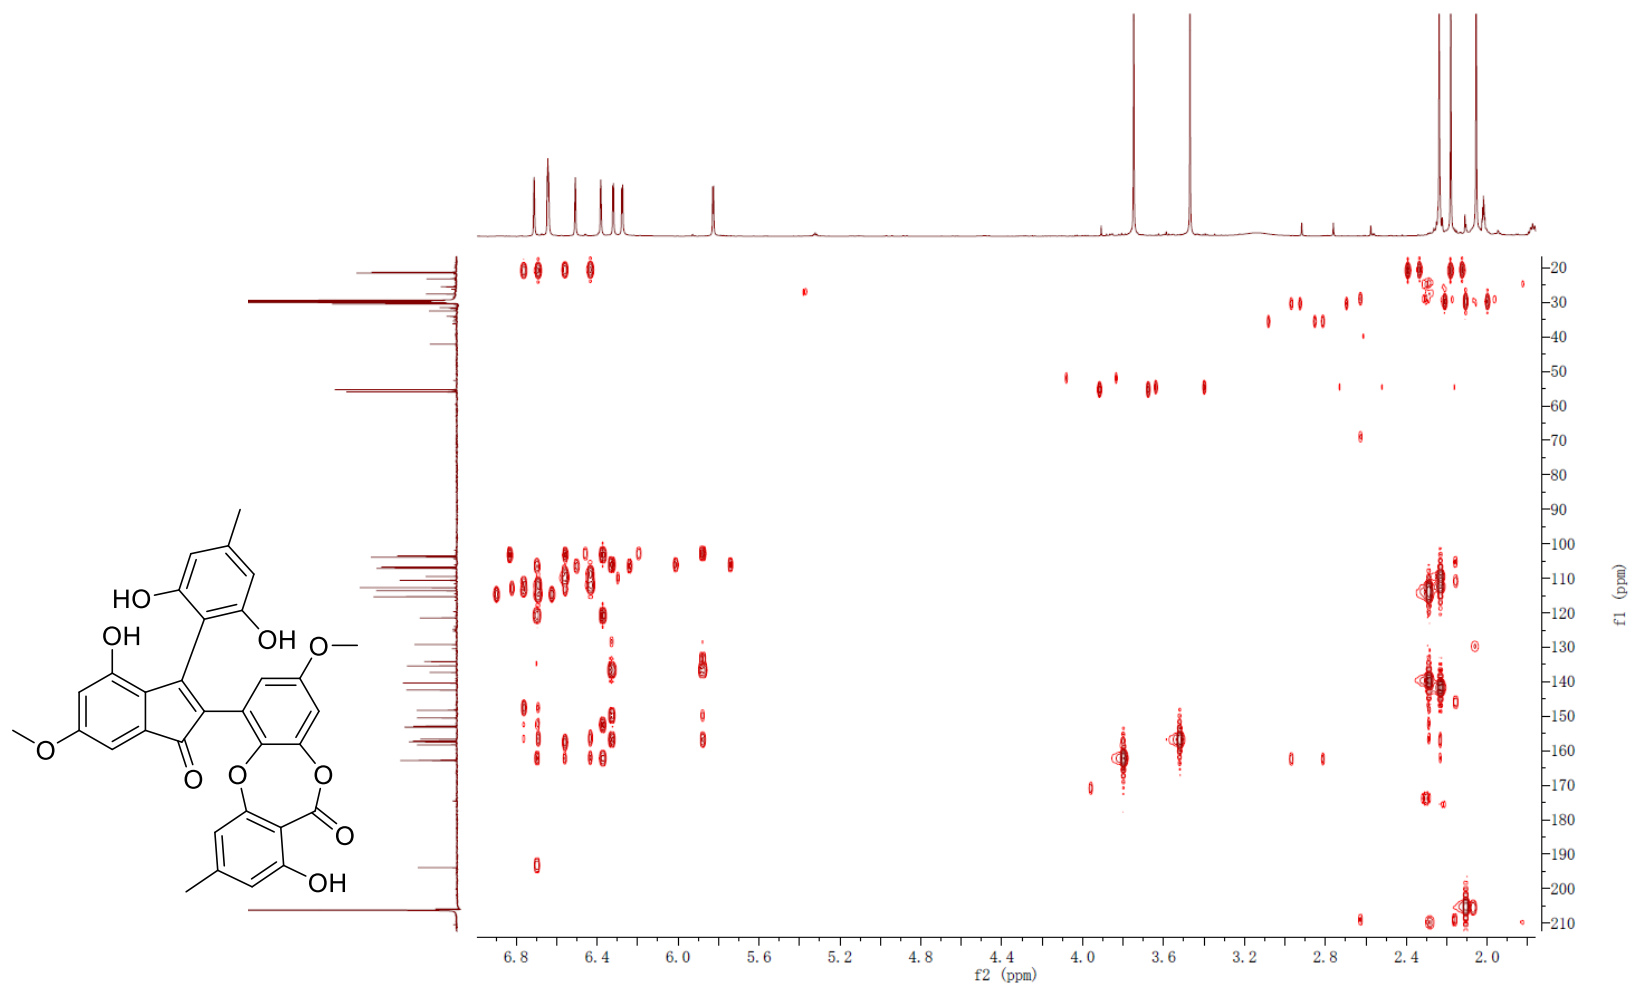



**Figure S22.**  $^1\text{H}$  NMR spectrum of compound **4** in methanol- $d_4$  (500 MHz).

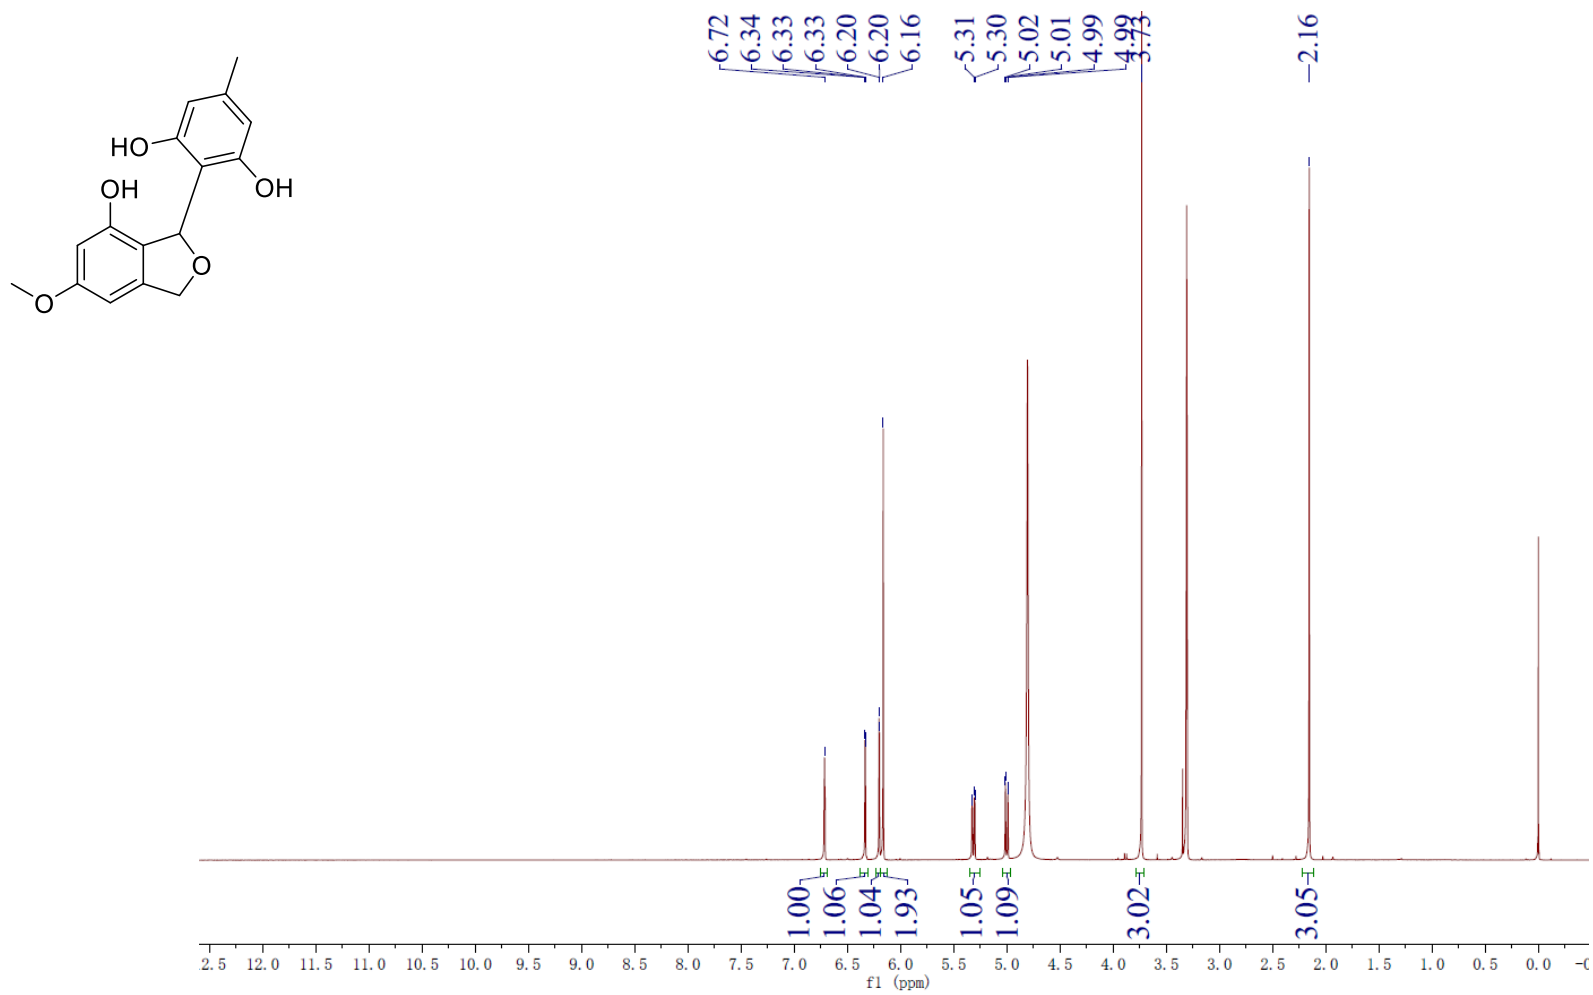

**Figure S23.**  $^{13}\text{C}$  NMR spectrum of compound **4** in methanol- $d_4$  (125 MHz).

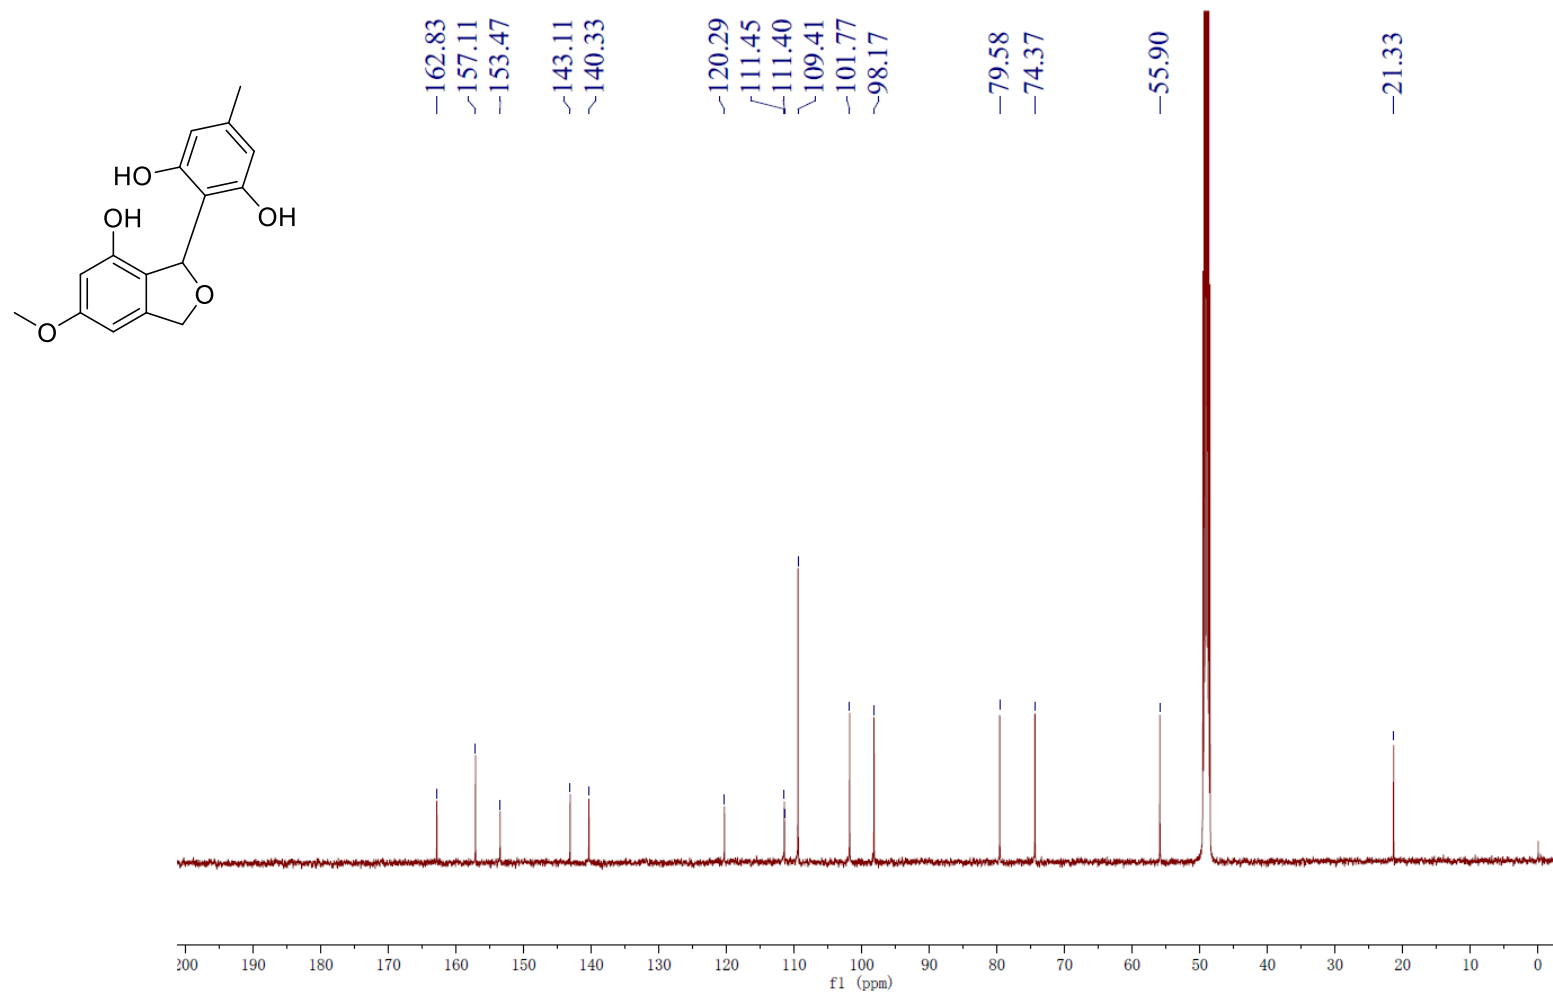

**Figure S24.** DEPT-90 ° spectrum of compound **4** in methanol- $d_4$  (125 MHz).

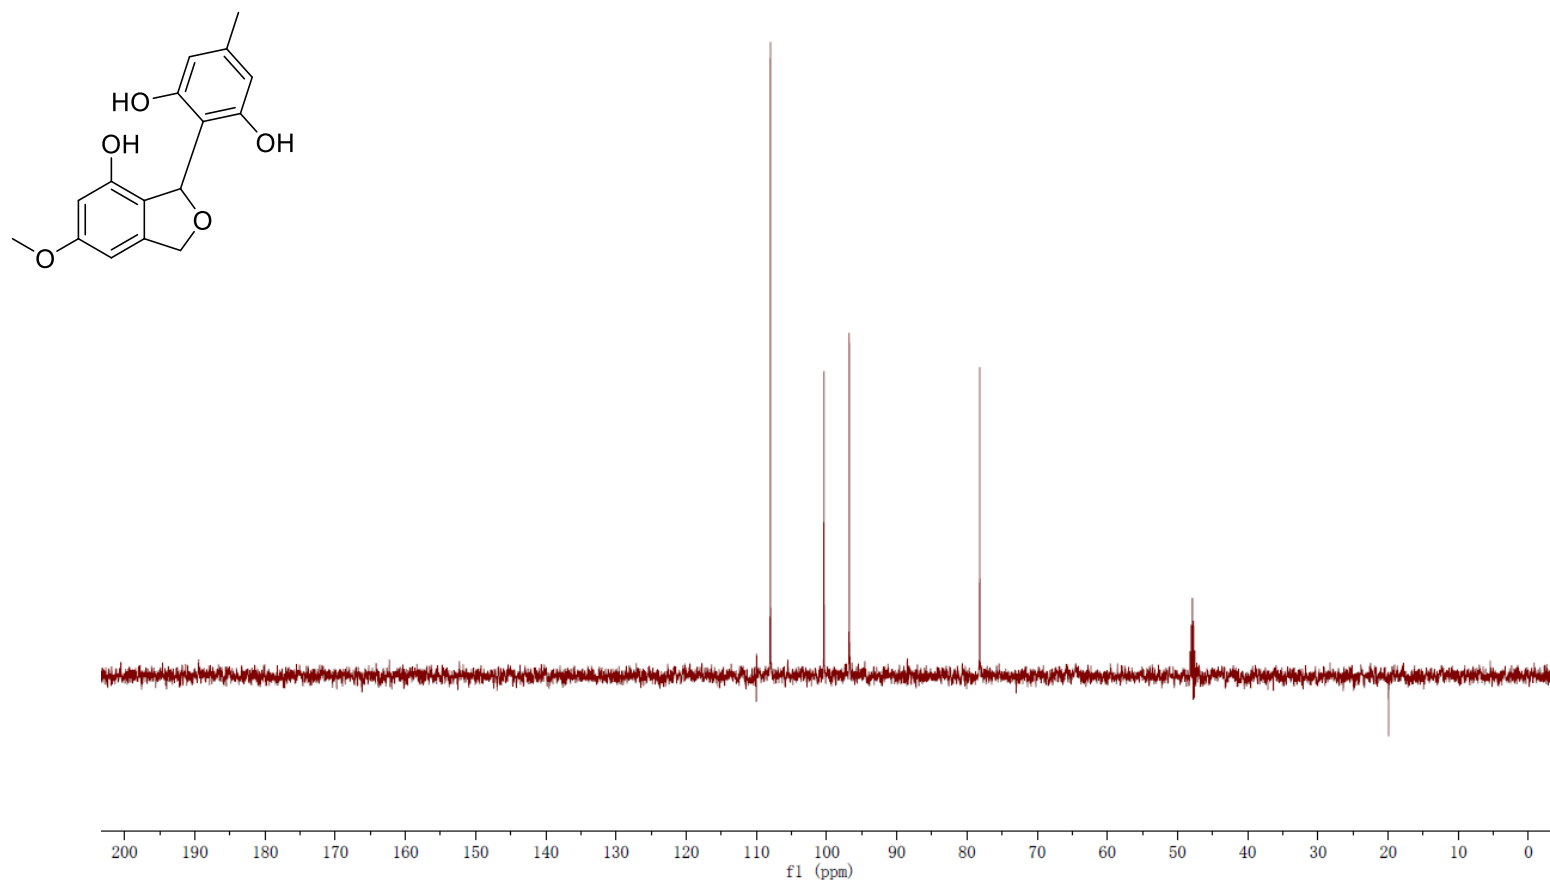

**Figure S25.** DEPT-135 ° spectrum of compound **4** in mathanol- $d_4$  (125 MHz).

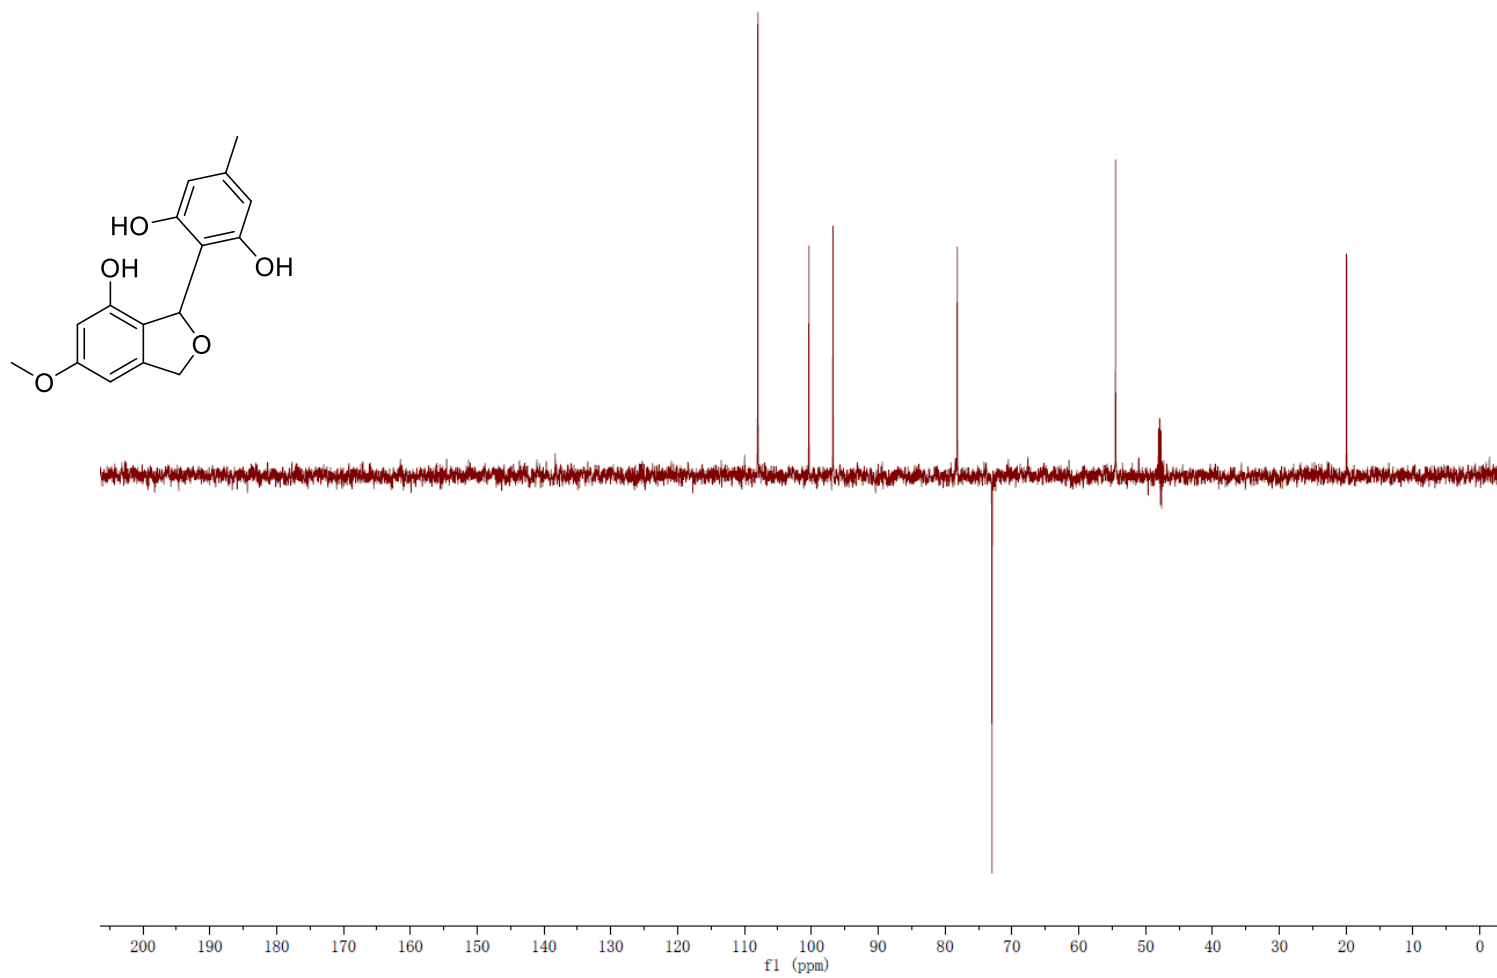

**Figure S26.**  $^1\text{H}$ - $^1\text{H}$  COSY spectrum of compound **4** in methanol- $d_4$  (600 MHz).

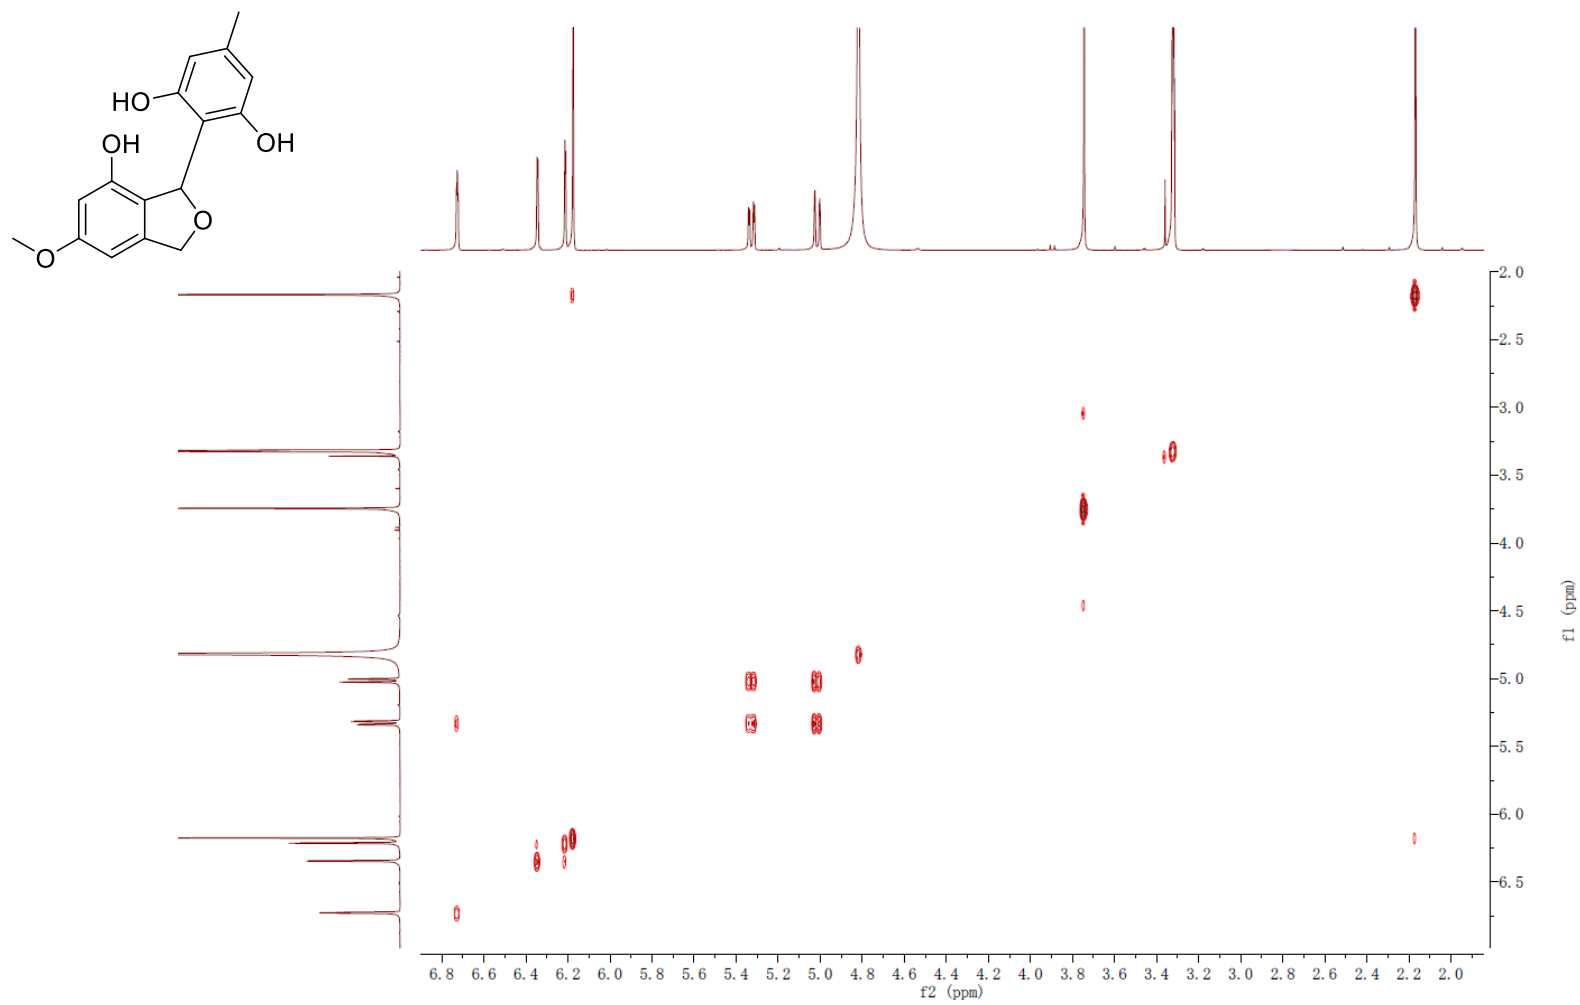

**Figure S27.** HSQC spectrum of compound **4** in methanol- $d_4$  (600 MHz).

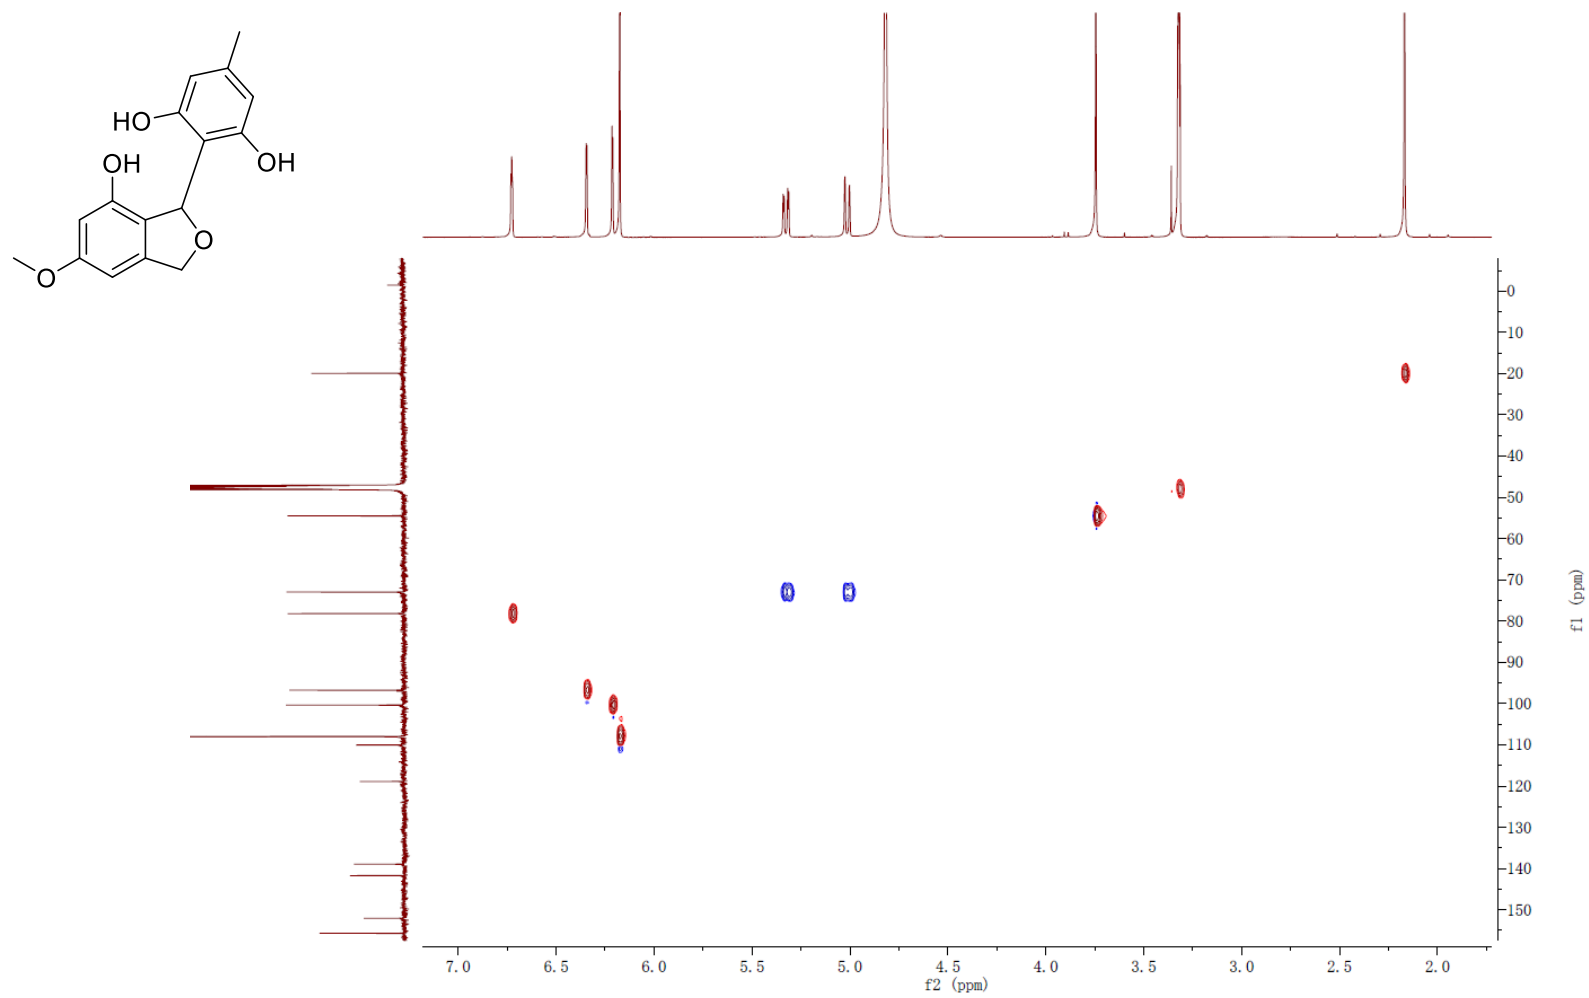

**Figure S28.** HMBC spectrum of compound **4** in methanol-*d*<sub>4</sub> (600 MHz).

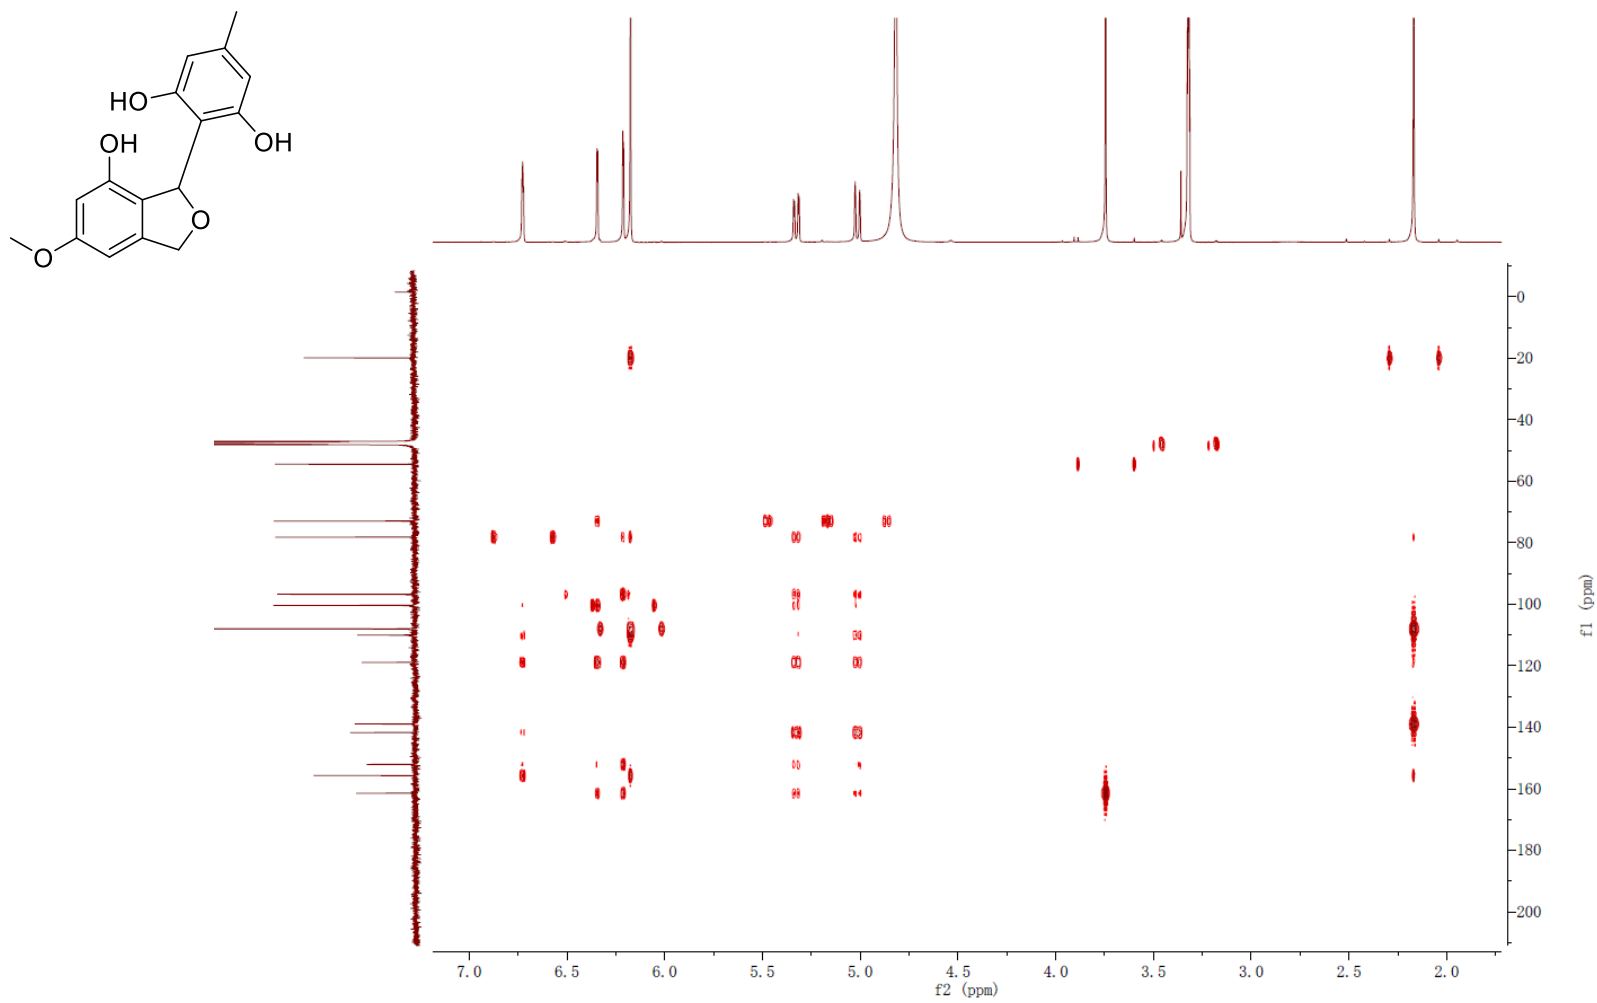

**Figure S29.**  $^1\text{H}$  NMR spectrum of compound **5** in methanol- $d_4$  (500 MHz).

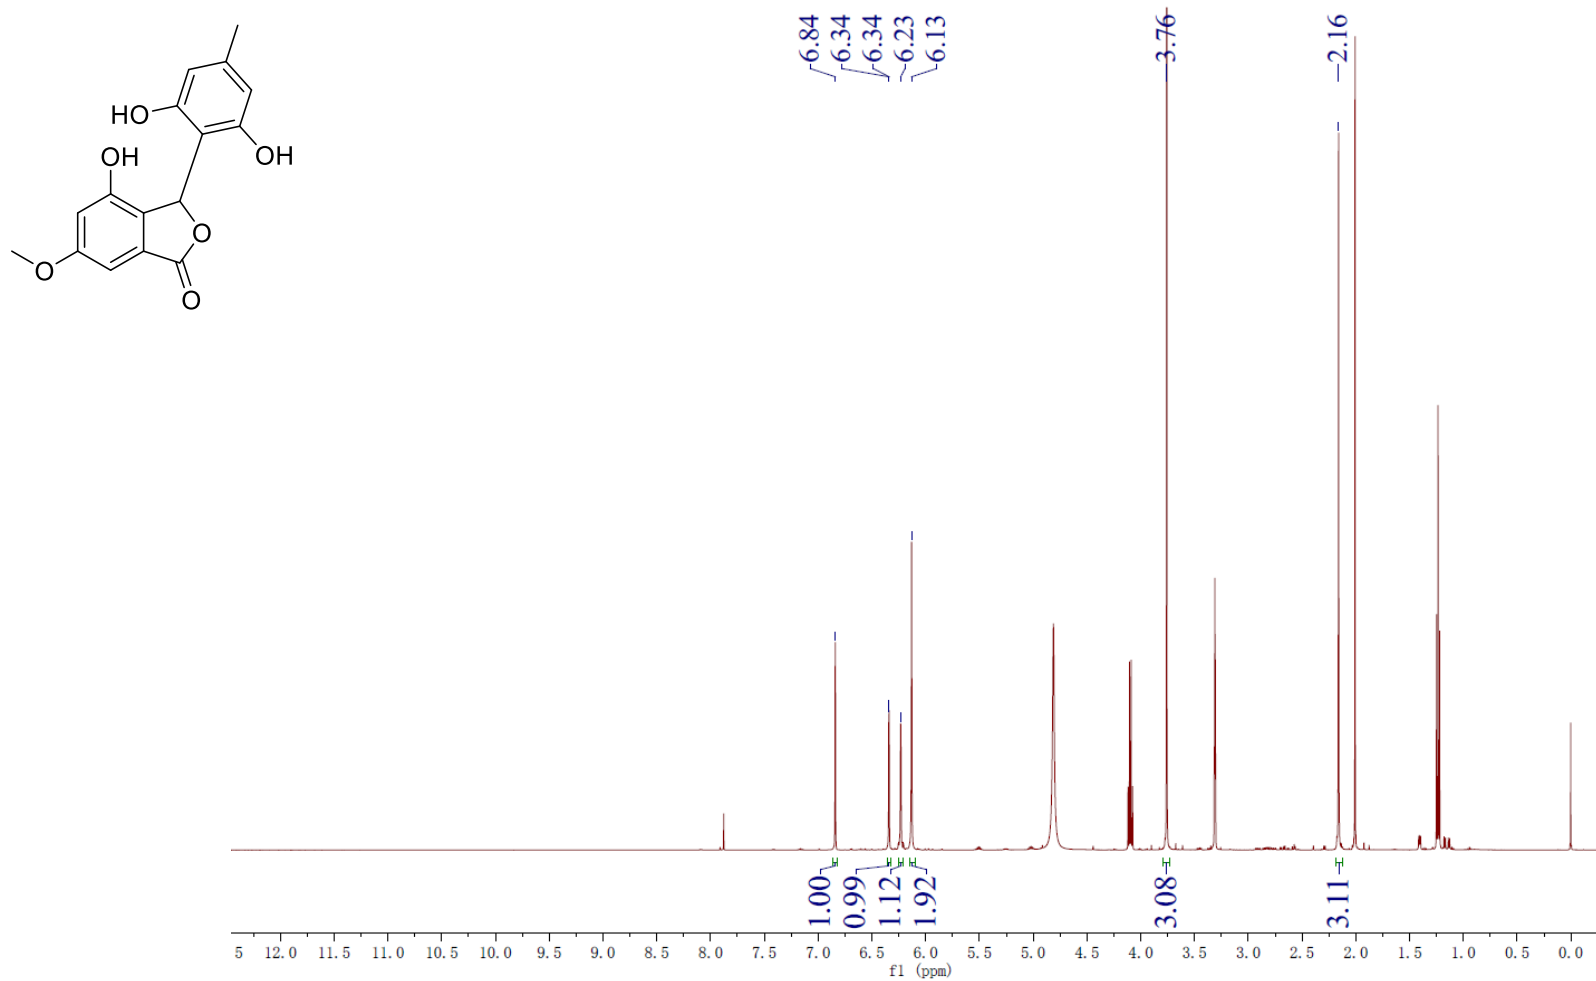



**Figure S30.**  $^{13}\text{C}$  NMR spectrum of compound **5** in methanol- $d_4$  (125 MHz).

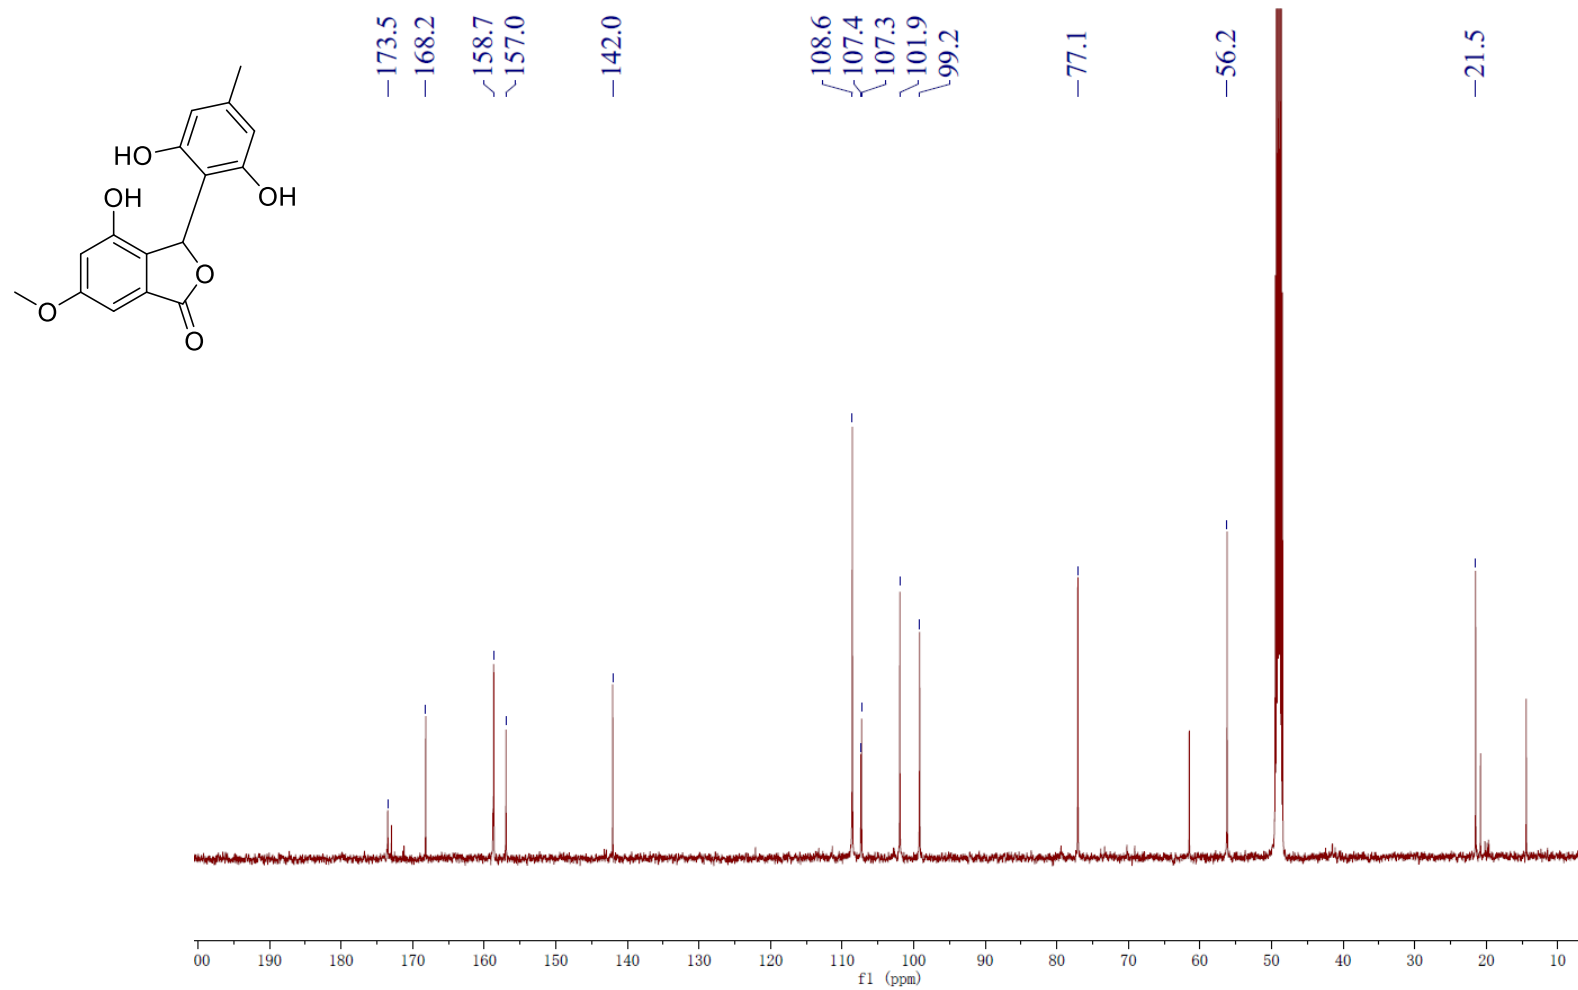

**Figure S31.** DEPT-90 ° spectrum of compound **5** in methanol- $d_4$  (125 MHz).

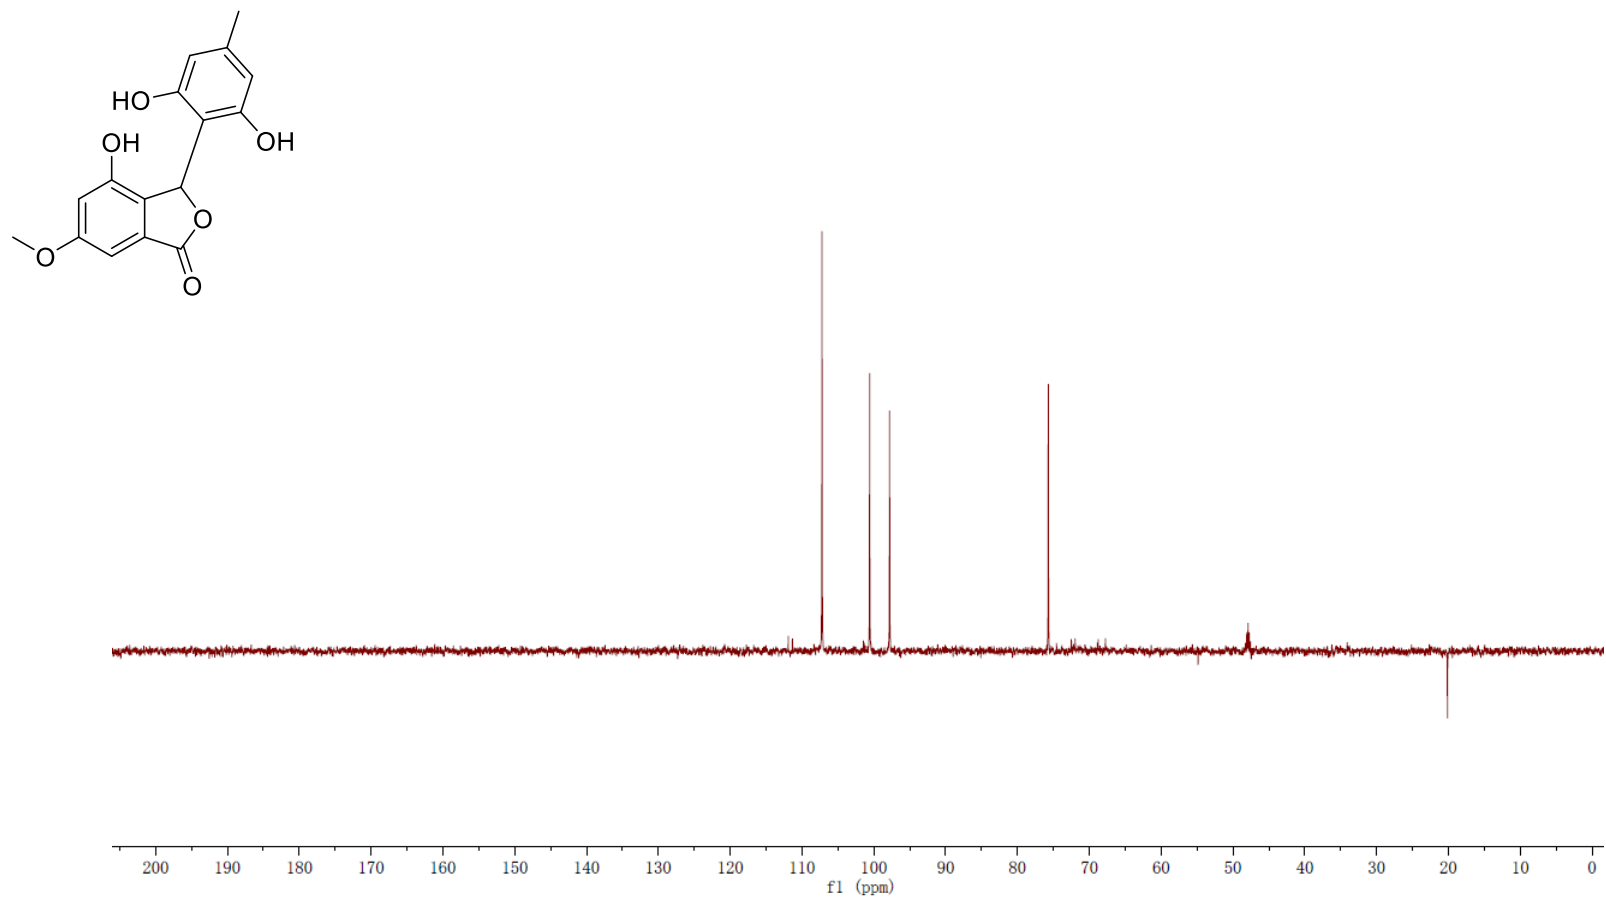

**Figure S32.** DEPT-135 ° spectrum of compound **5** in mathanol- $d_4$  (125 MHz).

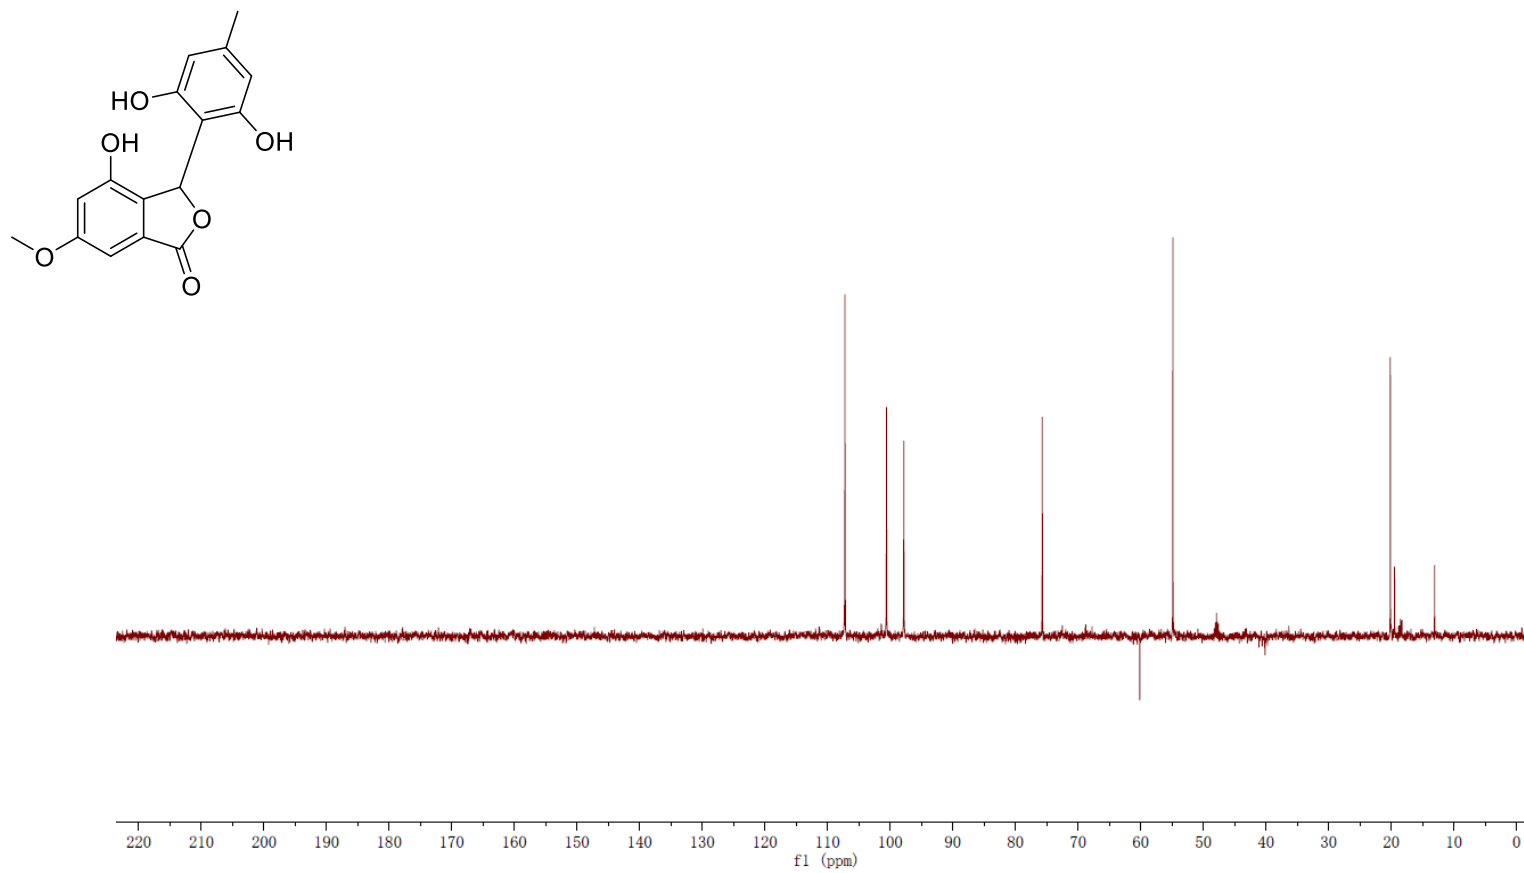

**Figure S33.**  $^1\text{H}$ - $^1\text{H}$  COSY spectrum of compound **5** in methanol- $d_4$  (600 MHz).

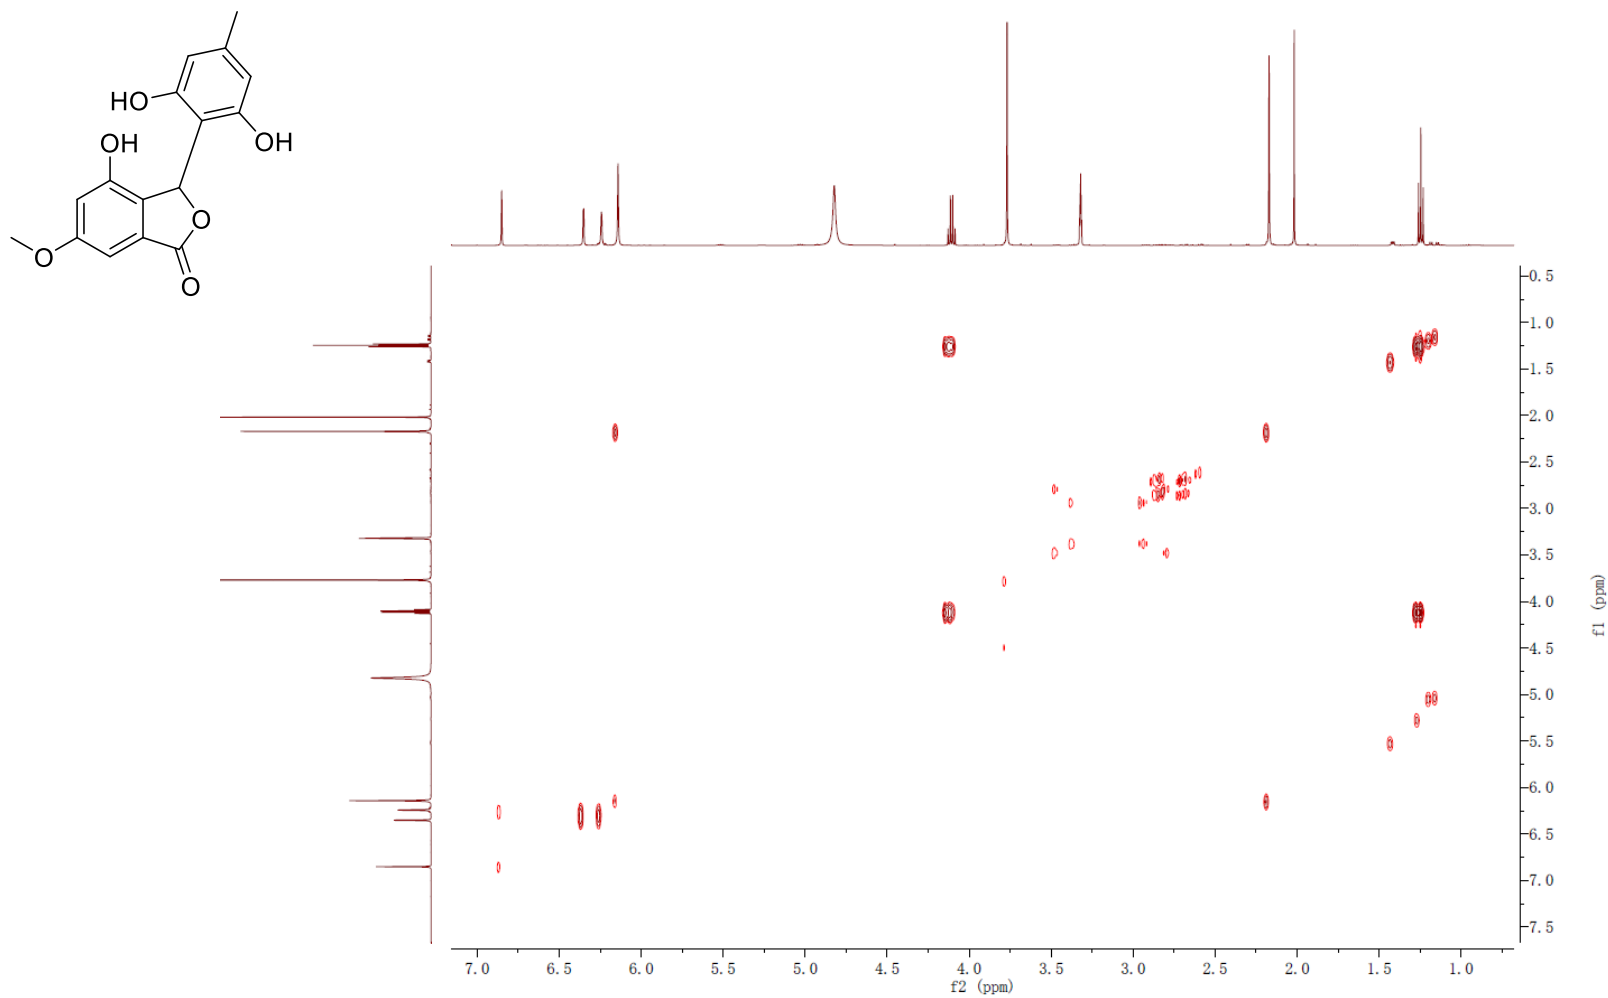

**Figure S34.** HSQC spectrum of compound **5** in methanol- $d_4$  (600 MHz).

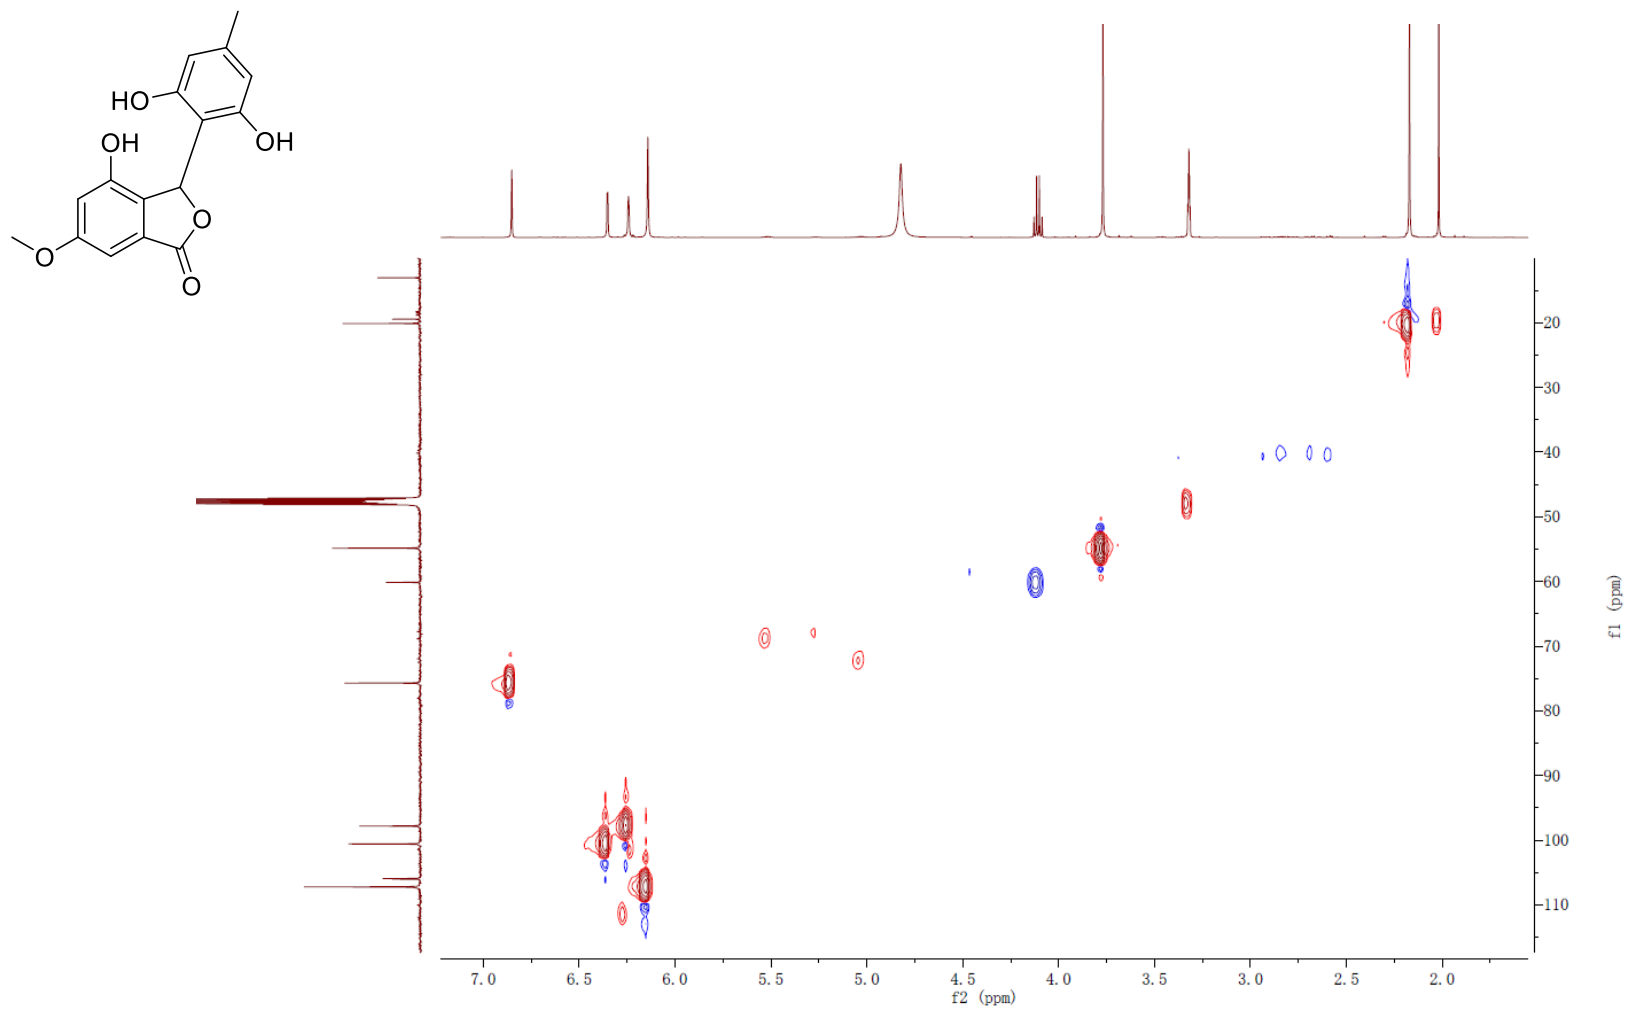

**Figure S35.** HMBC spectrum of compound **5** in methanol- $d_4$  (600 MHz).

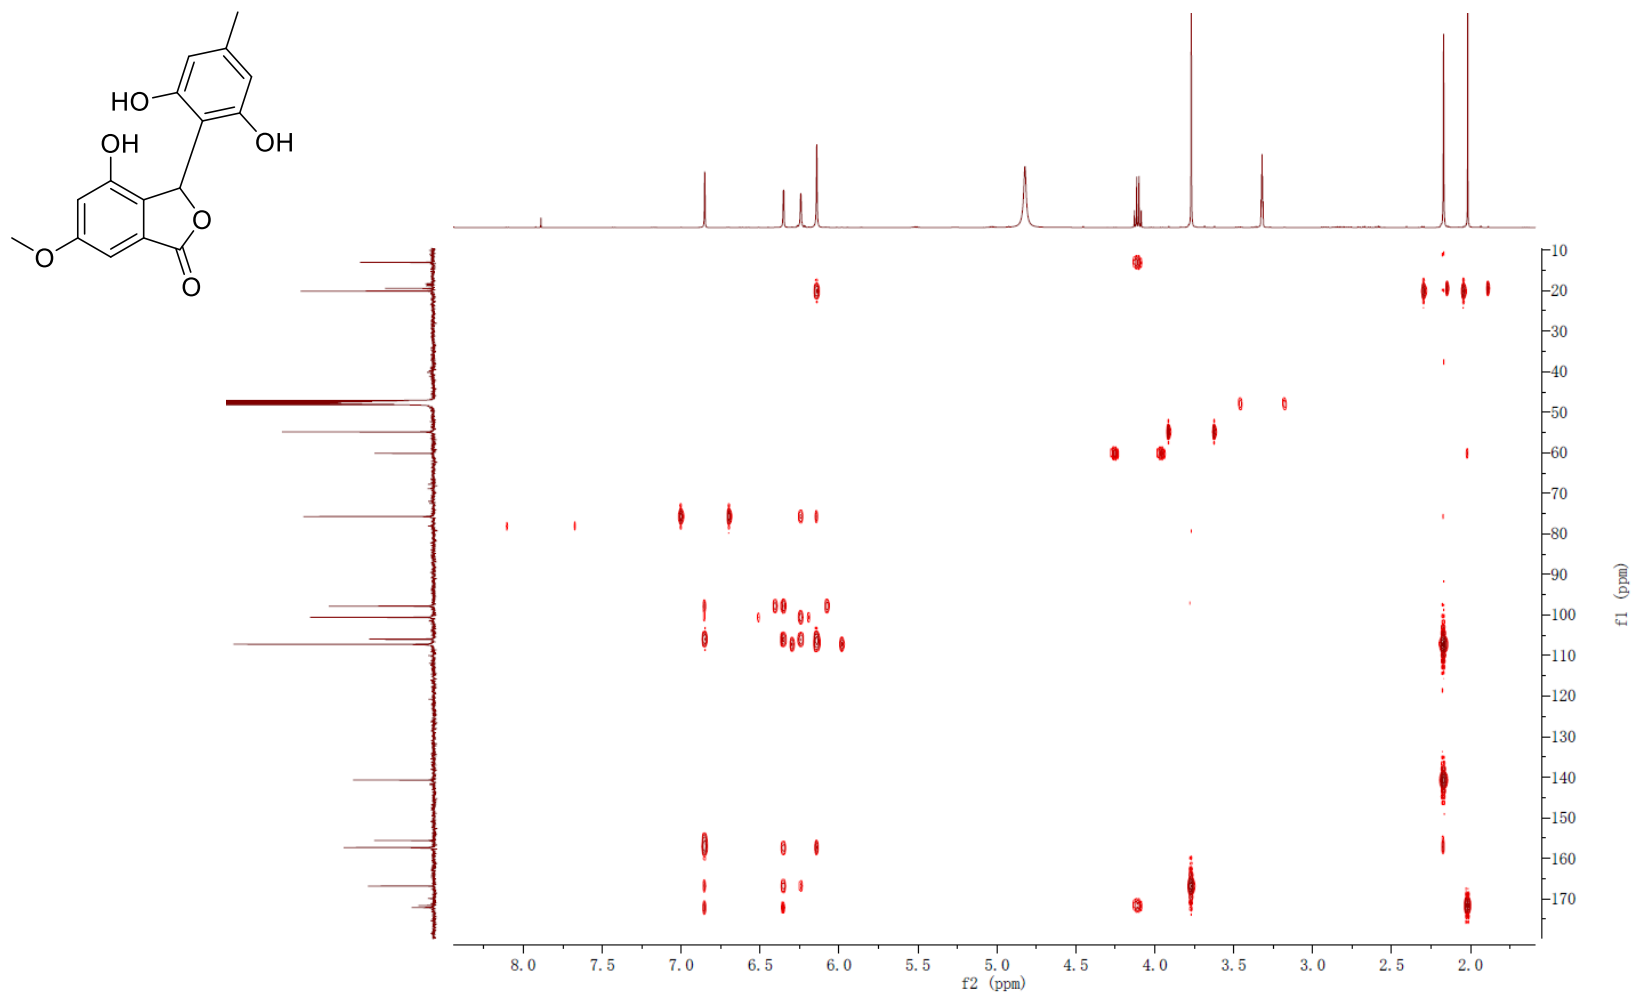

**Figure S36.** HRESIMS spectrum of compound **1**.

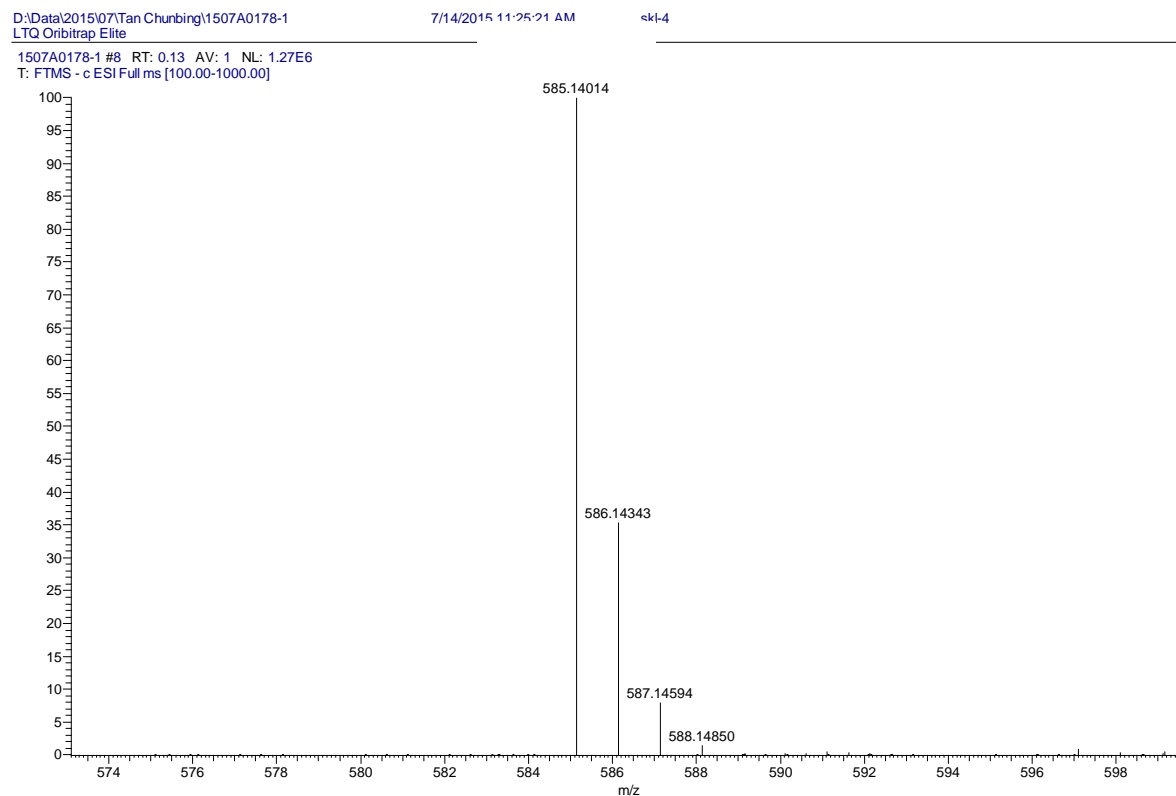

SPECTRUM - simulation :

| m/z       | Theo. Mass | Delta (ppm) | RDB equiv. | Composition                                     |
|-----------|------------|-------------|------------|-------------------------------------------------|
| 585.14014 | 585.14023  | -0.16       | 20.5       | C <sub>32</sub> H <sub>25</sub> O <sub>11</sub> |

**Limits:**

- (1) Charge: -1
- (2) Nitrogen-Rule: Do not use
- (3) Mass tolerance: 10.00 ppm
- (4) Elements in use: <sup>12</sup>C (25~35), <sup>1</sup>H (0~60), <sup>16</sup>O (0~15)

**Figure S37.** HRESIMS spectrum of compound **2**.

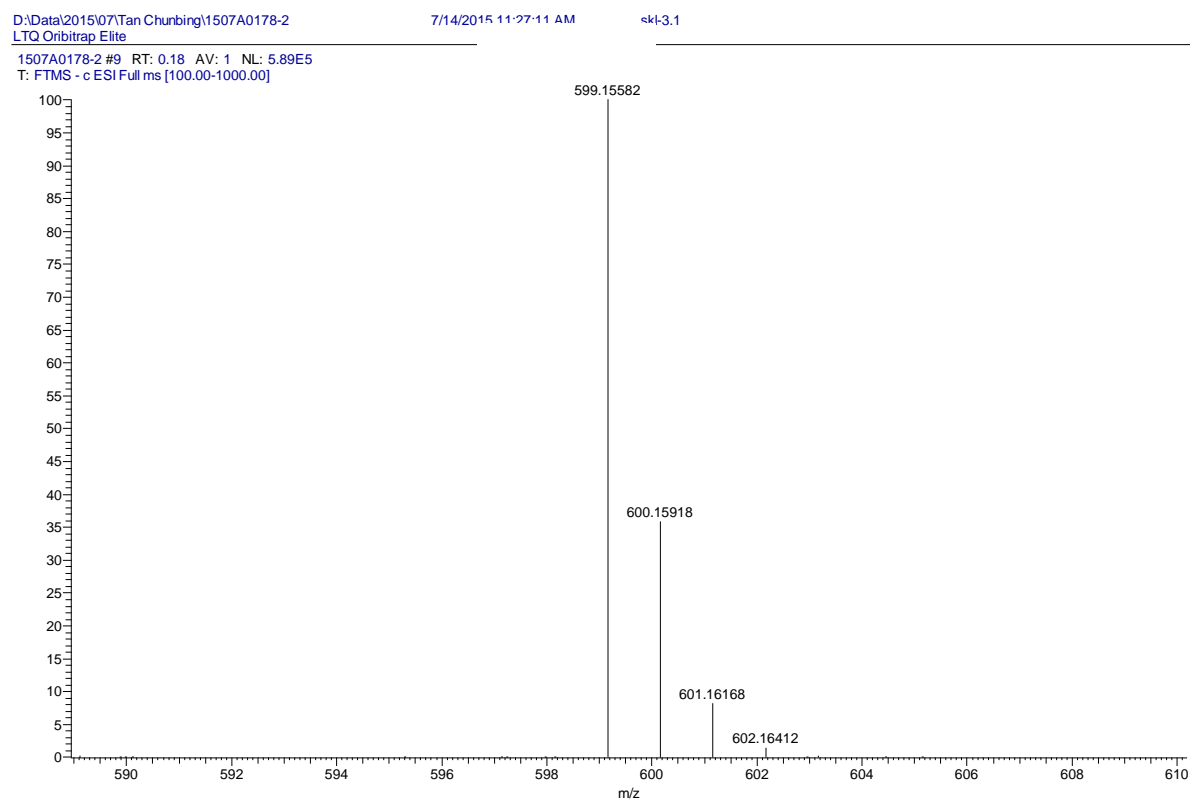

SPECTRUM - simulation :

| m/z       | Theo. Mass | Delta (ppm) | RDB equiv. | Composition                                     |
|-----------|------------|-------------|------------|-------------------------------------------------|
| 599.15582 | 599.15588  | -0.11       | 20.5       | C <sub>33</sub> H <sub>27</sub> O <sub>11</sub> |

**Limits:**

- (1) Charge: -1
- (2) Nitrogen-Rule: Do not use
- (3) Mass tolerance: 10.00 ppm
- (4) Elements in use: <sup>12</sup>C (25~35), <sup>1</sup>H (0~60), <sup>16</sup>O (0~15)



**Figure S38.** HRESIMS spectrum of compound **3**.

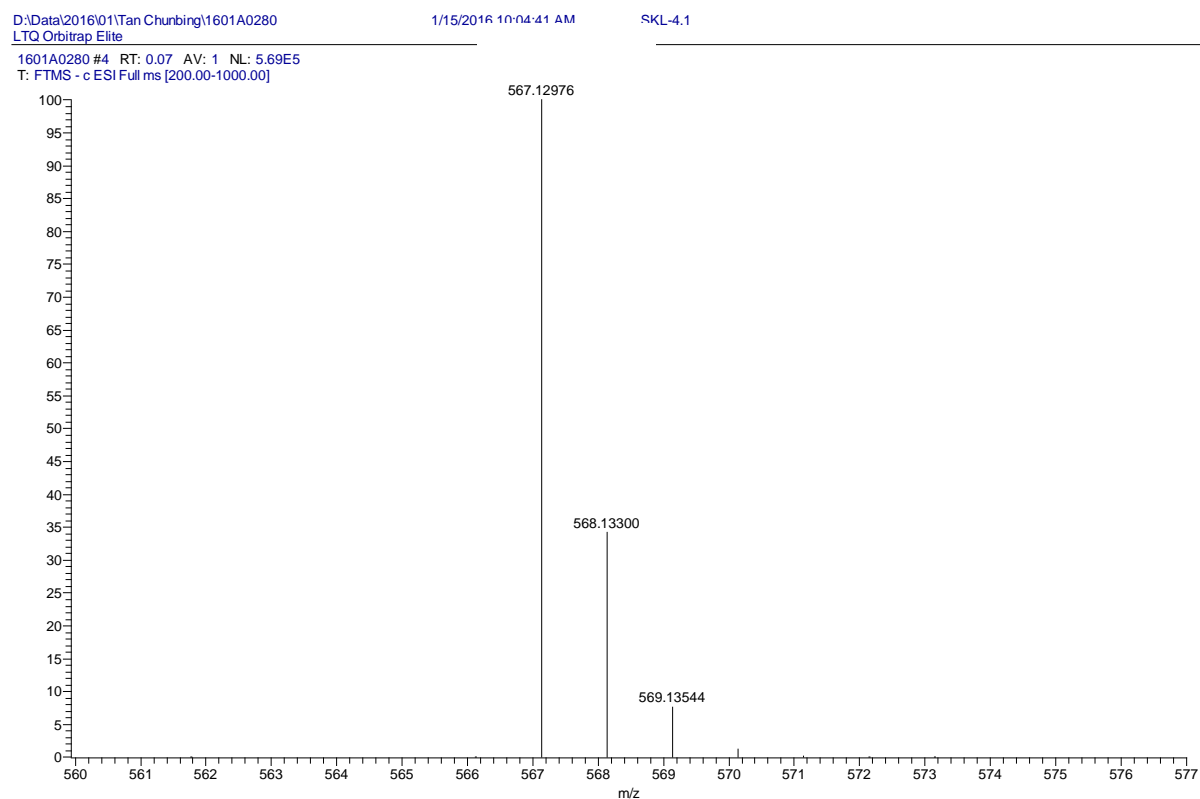

SPECTRUM - simulation :

| m/z       | Theo. Mass | Delta (ppm) | RDB equiv. | Composition                                     |
|-----------|------------|-------------|------------|-------------------------------------------------|
| 567.12976 | 567.12967  | 0.16        | 21.5       | C <sub>32</sub> H <sub>23</sub> O <sub>10</sub> |

**Limits:**

- (1) Charge: -1
- (2) Nitrogen-Rule: Do not use
- (3) Mass tolerance: 10.00 ppm
- (4) Elements in use: <sup>12</sup>C (0~40), <sup>1</sup>H (0~60), <sup>16</sup>O (0~15)

**Figure S39.** HRESIMS spectrum of compound **4**.

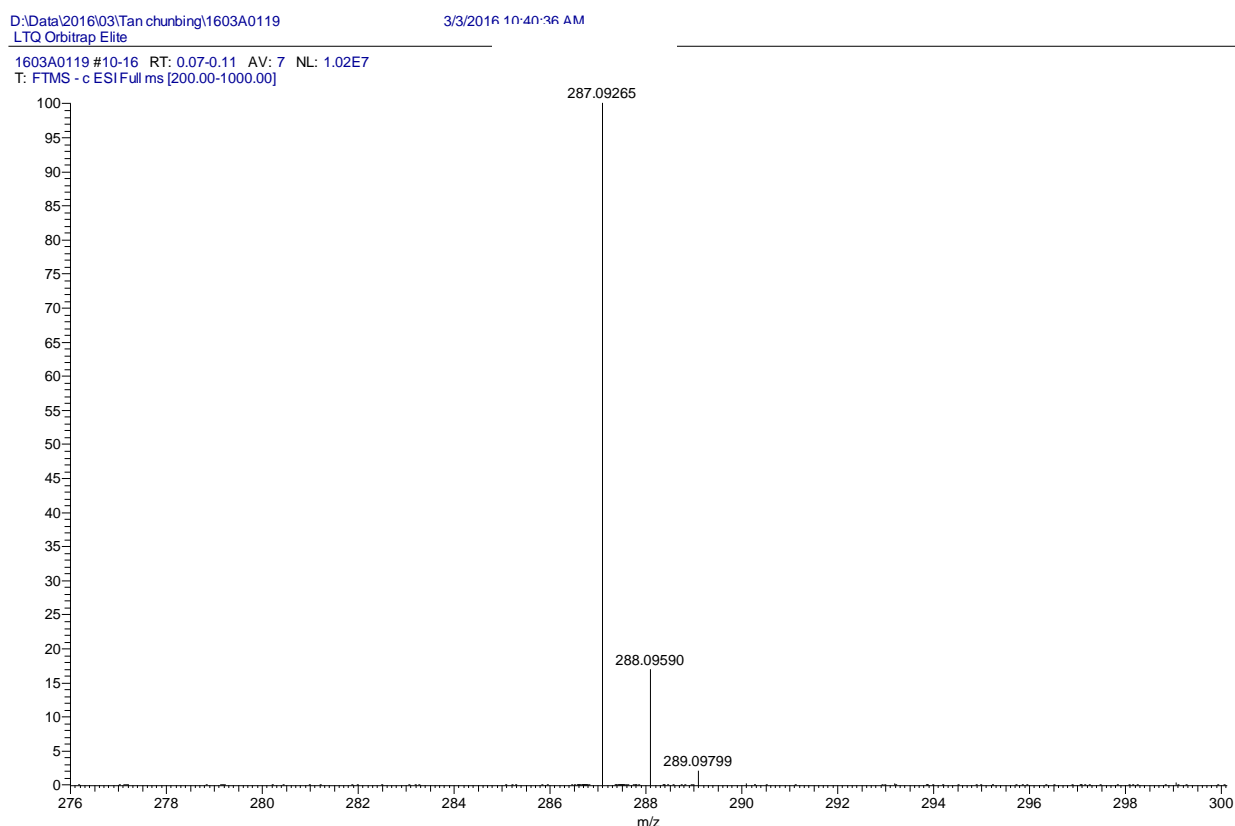

SPECTRUM - simulation :

| m/z       | Theo. Mass | Delta (ppm) | RDB equiv. | Composition |
|-----------|------------|-------------|------------|-------------|
| 287.09265 | 287.09250  | 0.53        | 9.5        | C16 H15 O5  |

**Limits:**

- (1) Charge: -1
- (2) Nitrogen-Rule: Do not use
- (3) Mass tolerance: 10.00 ppm
- (4) Elements in use:  $^{12}\text{C}$  (0~30),  $^1\text{H}$  (0~60),  $^{16}\text{O}$  (0~15);

**Figure S40.** HREI-MS spectrum of compound **5**.

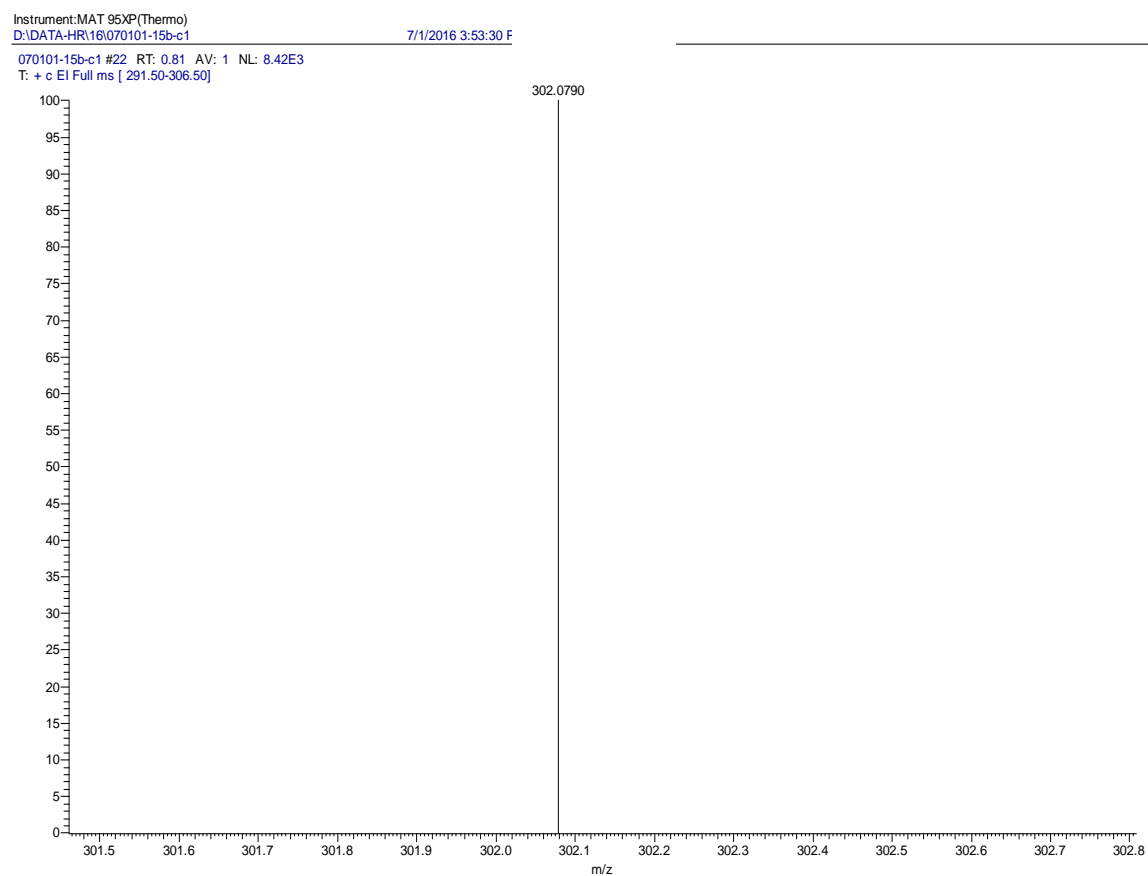

**SPECTRUM - MS**

File : D:\DATA-HR\16\070101-15b-c1.RAW

Full ms [291.500 - 306.500 ] - Range: 291.500 - 306.500

Scan No. 22 of 36

Scan #: 22

RT: 0.81

Data points: 1

| m/z      | Theo. Mass | Delta (ppm) | RDB equiv. | Composition                                    |
|----------|------------|-------------|------------|------------------------------------------------|
| 302.0790 | 302.0785   | 1.5         | 10         | C <sub>16</sub> H <sub>14</sub> O <sub>6</sub> |
